1 **Mutations in *HUA2* restore flowering in the *Arabidopsis trehalose***  
2 ***6-phosphate synthase1 (tps1)* mutant**

3  
4 **Liping Zeng<sup>1,2,\*</sup>, Vasiliki Zacharaki<sup>3</sup>, Yanwei Wang<sup>1</sup>, Markus Schmid<sup>1,3,4,\*</sup>**

5  
6 <sup>1</sup> Beijing Advanced Innovation Centre for Tree Breeding by Molecular Design, College of  
7 Biological Sciences and Biotechnology, Beijing Forestry University, Beijing 100083,  
8 People's Republic of China.

9 <sup>2</sup> School of Grassland Science, Beijing Forestry University, Beijing 100083, People's  
10 Republic of China.

11 <sup>3</sup> Umeå Plant Science Centre, Department of Plant Physiology, Umeå University, SE-901 87  
12 Umeå, Sweden.

13 <sup>4</sup> Department of Plant Biology, Linnean Center for Plant Biology, Swedish University of  
14 Agricultural Sciences, S-75007 Uppsala, Sweden.

15  
16 \* Corresponding author(s)

17  
18 **Author emails and ORCID:**

19 zenglp2020@163.com (0009-0005-3691-1505)

20 vasiliki.zacharaki@umu.se (0000-0002-5543-2332)

21 ywwang@bjfu.edu.cn (0000-0002-4111-4843)

22 markus.schmid@slu.se (0000-0002-0068-2967)

23  
24 **Short title:** *hua2* represses *tps1* mutation

25  
26 **Authors responsible for distribution of materials:**

27 Liping Zeng (zenglp2020@163.com) and Markus Schmid (markus.schmid@slu.se)

## 28 **Abstract**

29 Plant growth and development are regulated by many factors, including carbohydrate  
30 availability and signaling. Trehalose 6-phosphate (T6P), which is synthesized by  
31 TREHALOSE-6-PHOSPHATE SYNTHASE 1 (TPS1), is positively correlated with and  
32 functions as a signal that informs the cell about the carbohydrate status. Mutations in *TPS1*  
33 negatively affect the growth and development of *Arabidopsis thaliana* and complete  
34 loss-of-function alleles are embryo lethal, which can be overcome using inducible expression  
35 of *TPS1* (*GVG::TPS1*) during embryogenesis. Using EMS mutagenesis in combination with  
36 genome re-sequencing we have identified several alleles in the floral regulator *HUA2* that  
37 restore flowering and embryogenesis in *tps1-2 GVG::TPS1*. Genetic analyses using a *HUA2*  
38 T-DNA insertion allele, *hua2-4*, confirmed this finding. RNA-seq analyses demonstrated that  
39 *hua2-4* has widespread effects on the *tps1-2 GVG::TPS1* transcriptome, including key genes  
40 and pathways involved in regulating flowering. Higher order mutants combining *tps1-2*  
41 *GVG::TPS1* and *hua2-4* with alleles in the key flowering time regulators *FLOWERING*  
42 *LOCUS T (FT)*, *SUPPRESSOR OF OVEREXPRESSION OF CONSTANS 1 (SOC1)*, and  
43 *FLOWERING LOCUS C (FLC)* were constructed to analyze the role of *HUA2* during floral  
44 transition in *tps1-2* in more detail. Taken together, our findings demonstrate that loss of  
45 *HUA2* can restore flowering and embryogenesis in *tps1-2 GVG::TPS1* in part through  
46 activation of *FT*, with contributions of the upstream regulators *SOC1* and *FLC*. Interestingly,  
47 we found that mutation of *FLC* is sufficient to induce flowering in *tps1-2 GVG::TPS1*.  
48 Furthermore, we observed that mutations in *HUA2* modulate carbohydrate signaling and that  
49 this regulation might contribute to flowering in *hua2-4 tps1-2 GVG::TPS1*.

50

51 **Keywords:** carbohydrate signaling, Trehalose 6-phosphate (T6P), *TREHALOSE*  
52 *PHOSPHATE SYNTHASE1 (TPS1)*, *HUA2*, Flowering time, *Arabidopsis thaliana*

## 53 **Introduction**

54 Plants have evolved intricate signaling mechanisms that enable them to monitor a wide range  
55 of environmental and endogenous cues and adjust their physiology, growth, and development  
56 accordingly. Adjustments occur more or less constantly, but developmental phase transitions  
57 such as germination, the switch from juvenile to adult growth, or the induction of flowering  
58 and reproductive development are under particularly stringent control.

59 In *Arabidopsis thaliana*, the floral transition is controlled by environmental factors including  
60 exposure to prolonged periods of cold (vernalization), ambient temperature, day length  
61 (photoperiod), light quality, and endogenous signals such as plant age, diverse hormones  
62 including gibberellic acid (GA), and carbohydrate signaling (Srikanth and Schmid, 2011;  
63 Romera-Branchat et al., 2014; Cho et al., 2017). Eventually, these signaling pathways  
64 converge on and regulate the expression of key floral integrator genes such as *FLOWERING*  
65 *LOCUS T (FT)* and *SUPPRESSOR OF OVEREXPRESSION OF CONSTANS 1 (SOC1)*  
66 (Kardailsky et al., 1999; Moon et al., 2005; Kobayashi and Weigel, 2007; Turck et al., 2008;  
67 Lee and Lee, 2010; Jung et al., 2012). *FT* is induced in response to permissive photoperiod in  
68 the leaf vasculature where it is also translated. The FT protein is then transported via the  
69 phloem to the shoot apical meristem (SAM) where it interacts with the bZIP transcription  
70 factor FD and 14-3-3 proteins to form the florigen activation complex (FAC) (Abe et al.,  
71 2005; Wigge et al., 2005; Mathieu et al., 2007; Taoka et al., 2011; Collani et al., 2019). In  
72 contrast, *SOC1* is induced and acts largely at the SAM, both downstream and in parallel to *FT*  
73 (Yoo et al., 2005; Lee and Lee, 2010). Eventually, these factors induce flower meristem  
74 identity genes such as *LEAFY (LFY)* and *APETALA1 (API)* at the SAM, thus completing the  
75 floral transition (Weigel and Nilsson, 1995; Liljegren et al., 1999; Blázquez and Weigel,  
76 2000).

77 Apart from photoperiod, carbohydrate signaling has been shown to be necessary for *FT*  
78 expression (Wahl et al., 2013). Sucrose is the major product of photosynthesis and most  
79 common transport-sugar. However, rather than measuring sucrose concentration directly,  
80 plants employ trehalose 6-phosphate (T6P) as a readout and signal of sucrose availability  
81 (Goddijn and van Dun, 1999; Lunn et al., 2006; Martins et al., 2013; Yadav et al., 2014;

82 Figueroa and Lunn, 2016). T6P is the intermediate of trehalose synthesis. It is synthesized  
83 from glucose 6-phosphate and uridine diphosphate glucose by TREHALOSE  
84 6-PHOSPHATE SYNTHASE (TPS) and subsequently dephosphorylated by TREHALOSE  
85 6-PHOSPHATE PHOSPHATASE (TPP) (Cabib and Leloir, 1958).

86 In *Arabidopsis thaliana*, there are 11 *TPS* genes (*AtTPS1–AtTPS11*), which can be divided  
87 into two subclades, class I and class II, and 10 TPP genes (*TPPA–TPPJ*) (Leyman et al., 2001;  
88 Lunn, 2007; Vandesteene et al., 2012). Of the class I *TPS* genes (*AtTPS1–AtTPS4*), only  
89 *AtTPS1*, *AtTPS2*, and *AtTPS4* have demonstrable catalytic activity, whereas *AtTPS3* harbors a  
90 premature translational stop codon and is likely a pseudogene (Blázquez et al., 1998; Van  
91 Dijk et al., 2002; Lunn, 2007; Delorge et al., 2015). Class II *TPS* genes (*AtTPS5–AtTPS11*),  
92 for which no TPS activity, has been detected, which have been reported to participate in cell  
93 size regulation, thermotolerance, and cold and salt resistance, but the underlying molecular  
94 mechanisms remain largely unclear (Chary et al., 2008; Ramon et al., 2009; Singh et al., 2011;  
95 Tian et al., 2019; Van Leene et al., 2022). The main T6P synthase in *Arabidopsis thaliana* is  
96 *TPS1*. *TPS1* loss-of-function mutants are embryonic lethal (Eastmond et al., 2002), but  
97 homozygous *tps1-2* mutants could be established by dexamethasone-inducible expression of  
98 *TPS1* (*GVG::TPS1*) during embryogenesis (van Dijken et al., 2004). Interestingly, the  
99 resulting homozygous *tps1-2 GVG::TPS1* plants flower extremely late compared to wild type  
100 under both short- and long-day conditions. At the molecular level, late flowering of *tps1-2*  
101 *GVG::TPS1* has been attributed to the combined misregulation of key flowering time genes.  
102 In particular, *tps1-2 GVG::TPS1* mutant plants fail to induce *FT* in leaves even under  
103 permissive photoperiod. In addition, *MIR156* and its targets, the *SQUAMOSA PROMOTER*  
104 *BINDING PROTEIN LIKE* (*SPL*) genes, which together constitute the age pathway, are also  
105 misregulated in *tps1-2 GVG::TPS1* (Wahl et al., 2013). Nevertheless, many questions  
106 regarding the regulation of plant growth and development by the T6P pathway remain open.

107 In an EMS suppressor screen, we have recently reported dozens of mutations that partially  
108 restored flowering and seed set in *tps1-2 GVG::TPS1*, including several alleles in *SNF1*  
109 *KINASE HOMOLOG 10* (*KIN10*) and *HOMOLOG OF YEAST SUCROSE*  
110 *NONFERMENTING 4* (*SNF4*), two subunits of *Arabidopsis thaliana* *SNF1-Related Kinase 1*

111 (*SnRK1*) (Jung et al., 2012; Zacharaki et al., 2022), an evolutionary conserved regulator of  
112 cellular energy homeostasis.

113 Here, we identified several new alleles in *HUA2* (*At5g23150*) that partially rescue the *tps1-2*  
114 *GVG::TPS1* phenotype. Mutations in *HUA2* were originally identified in a genetic screen as  
115 enhancers of the *AGAMOUS* (*AG*) allele *ag-4* (Chen and Meyerowitz, 1999). In addition,  
116 *HUA2* has also been reported to affect shoot morphology and function as a repressor of  
117 flowering (Doyle et al., 2005; Wang et al., 2007). At the molecular level, *HUA2* has been  
118 suggested to function as a putative transcription factor but has also been implicated in RNA  
119 processing (Cheng et al., 2003). We show that three different EMS-induced point mutations  
120 in *HUA2* restore flowering in *tps1-2 GVG::TPS1* and verify this finding using a previously  
121 described T-DNA insertion allele, *hua2-4*. RNA-seq analyses revealed widespread effects of  
122 *hua2-4* on the *tps1 GVG::TPS1* transcriptome, including activation of flower integrator genes  
123 such as *SOC1* and *AGAMOUS-LIKE 24* (*AGL24*). Genetic analyses demonstrated that  
124 induction of flowering in *tps1-2 GVG::TPS1* required functional *FT*. Furthermore, we  
125 observed that loss of *FLOWERING LOCUS C* (*FLC*) is sufficient to induce flowering in  
126 *tps1-2 GVG::TPS1*. Interestingly, *hua2-4* also attenuated the induction of known SnRK1  
127 target genes in response to carbon starvation. Taken together, our results identify mutations in  
128 *HUA2* as suppressors of the non-flowering phenotype of *tps1-2 GVG::TPS1* and provide  
129 insights into the underlying genetic and molecular pathways.

130

## 131 **Results**

### 132 **Mutations in *hua2* restore flowering in *tps1-2 GVG::TPS1***

133 To identify novel components of the T6P pathway, we recently conducted a suppressor screen  
134 in which the non-flowering *tps1-2 GVG::TPS1* mutant was subjected to ethyl methane  
135 sulfonate (EMS) mutagenesis. In total, 106 M2 mutant plants in which flowering and seed set  
136 was at least partially restored were isolated, and EMS-induced SNPs were identified by  
137 whole genome sequencing in a subset of 65 mutants (Zacharaki et al., 2022). To identify

138 additional candidate suppressor genes in which SNPs were overrepresented, we expanded this  
139 list to 92 by sequencing the genomes of another 27 mutants (Table S1).

140 Analysis of these 92 genome sequences for genes with multiple independent EMS-induced  
141 mutations identified three SNPs in the coding sequence of *HUA2* (*AT5G23150*) (Table S2,  
142 S3). The three alleles result in non-synonymous amino acid substitutions, namely A983T,  
143 P455S, and R902C. We refer to these new EMS-induced suppressor lines as *hua2-11* (line  
144 #8-1-1), *hua2-12* (line #233-14-1), and *hua2-13* (line #164-9-1), respectively (Fig. 1A). The  
145 polymorphism R902C resides at the C-terminal end of the HUA2 CID motif (RNA Pol-II  
146 C-terminal domain (CTD) interaction domain). The *hua2-11* (line #8-1-1) allele was also  
147 detected in two additional suppressor lines, #57-2-1 and #30-34 (Table S2, S3). As these  
148 three lines share most EMS-induced SNPs genome-wide, we assume these lines originate  
149 from the same parental plant.

150 Importantly, flowering was restored in all three *hua2* alleles, even though all three mutant  
151 lines produced substantially more leaves before making the transition to flowering than Col-0  
152 control plants (Fig. 1B, C). The flowering time of *hua2-11* was 32.15 days, whereas *hua2-12*  
153 and *hua2-13* flowered after 46.5 and 50.9 days, respectively, compared to Col-0, which  
154 flowered after 25.2 days. Thus, the three mutants form an allelic series with *hua2-11* being  
155 the strongest and *hua2-13* being the weakest allele. As *HUA2* has previously been implicated  
156 in flowering time regulation and has been shown to regulate the expression of a group of  
157 MADS-box transcription factors known to form a floral repressive complex in *Arabidopsis*  
158 *thaliana* (Doyle et al., 2005; Wang et al., 2007; Lee et al., 2013; Posé et al., 2013; Jali et al.,  
159 2014; Yan et al., 2016), we considered mutations in this gene as likely to be causal for the  
160 restoration of flowering in the *tps1-2 GVG::TPS1* suppressor lines.

161 Since the three *hua2* alleles described above were generated through EMS mutagenesis, it is  
162 possible that other independent mutations not linked to *HUA2* could be involved in partially  
163 rescuing the *tps1-2 GVG::TPS1* phenotype. To confirm that mutations in *HUA2* are causal for  
164 the suppression of the *tps1-2* non-flowering phenotype, we crossed *tps1-2 GVG::TPS1* with  
165 *hua2-4*, a previously described *hua2* loss-of-function mutant that carries a T-DNA insertion  
166 in the 2<sup>nd</sup> intron (Fig. 2A) (Doyle et al., 2005). Of the F2 plants homozygous for the *tps1-2*

176 mutations, only those approx. 25% that were homozygous for the *hua2-4* T-DNA insertion  
177 flowered without application of dexamethasone. Similar to *hua2-11 tps1-2 GVG::TPS1* (Fig.  
178 1B,C), *hua2-4 tps1-2 GVG::TPS1* double mutants displayed a bushy shoot phenotype and  
179 were moderately late flowering (Fig. 2B,C). Taken together, our findings confirm that  
180 recessive mutations in *HUA2* are responsible for the induction of flowering in *tps1-2*  
181 *GVG::TPS1*. Our findings also suggest that *HUA2* normally functions by repressing  
182 flowering either directly or indirectly through the promotion of floral repressors.

### 183 ***hua2-4* has widespread effects on the *tps1-2 GVG::TPS1* transcriptome**

184 To identify possible downstream targets of *HUA2* whose misexpression might explain the  
185 induction of flowering in the suppressor mutant, we performed RNA-seq analysis in leaves of  
186 21-d-old *tps1-2 GVG::TPS1* plants, *tps1-2 GVG::TPS1* plants treated with dexamethasone,  
187 and the *hua2-4 tps1-2 GVG::TPS1* double mutant. Plants were grown under long days (16 h  
188 light, 8 h dark) in the presence or absence of dexamethasone and samples were collected at  
189 ZT4 (Zeitgeber time 4, means 4 h after lights on). Genes that were differentially expressed in  
190 three independent replicates per genotype and treatment were identified using Cuffdiff.

191 We observed that dexamethasone treatment significantly affected the expression of 9600  
192 genes in *tps1-2 GVG::TPS1*. Of these, 4830 and 4770 genes were upregulated and  
193 downregulated, respectively (Fig. 3A). In contrast, mutation of *hua2* affected the expression  
194 of only 2066 genes, of which 988 and 1078 genes were upregulated and downregulated in  
195 *hua2-4 tps1-2 GVG::TPS1*, respectively (Fig. 3A). In total our RNA-seq analysis identified  
196 1437 genes that are differentially expressed in *tps1-2 GVG::TPS1* in response to  
197 dexamethasone application and the *hua2-4* mutation. Importantly, *HUA2* expression is not  
198 changed in *tps1-2 GVG::TPS1* in response to dexamethasone application, suggesting that  
199 *hua2* might induce flowering largely by activating a pathway not normally regulated by the  
200 T6P pathway (Fig. S1).

201 Since both, dexamethasone application and mutations in *hua2* can induce flowering in *tps1-2*  
202 *GVG::TPS1*, we next searched for genes that were repressed or induced in response to either  
203 treatment. We identified 412 genes that were downregulated in *tps1-2 GVG::TPS1* in

195 response to dexamethasone application and mutations in *hua2* (Fig. 3A). Gene ontology (GO)  
196 analysis revealed that among others, processes such as flavonoid metabolism (GO:0009812),  
197 carbohydrate transport (GO:0008643), and starvation response (GO:0009267) were  
198 significantly enriched, which is in line with the well-established role of *TPS1* in remodeling  
199 carbohydrate metabolism (Fig. 3B; Table S4).

200 In addition, we identified 243 genes that were induced in response to dexamethasone and in  
201 *hua2-4 tps1-2 GVG::TPS1*. Among these genes, GO categories related to the response to  
202 gibberellin (GO:0009739) and the regulation of timing of meristematic phase transition  
203 (GO:0048506) are of particular interest as they are directly linked to the transition to  
204 flowering (Fig. 3C; Table S5). Importantly, among the genes induced in *tps1-2 GVG::TPS1*  
205 by dexamethasone and *hua2* were *SUPPRESSOR OF OVEREXPRESSION OF CONSTANS 1*  
206 (*SOC1*) and *AGAMOUS-LIKE 24 (AGL24)*, two MADS-domain transcription factors known  
207 to promote the transition to flowering (Fig. 3D; Table S6). In contrast, other known flowering  
208 time regulators such as *CONSTANS (CO)*, *FT*, and *TWIN SISTER OF FT (TSF)* are either  
209 hardly detectable (Fig. S2A), possibly because of the collection time of the RNA-seq samples  
210 at ZT 4 or did not change significantly in *hua2* and in response to dexamethasone treatment  
211 (Fig. S2B). In summary, our transcriptome analysis identified several downstream genes and  
212 pathways whose misregulation could contribute to the induction of flowering in *tps1-2*  
213 *GVG::TPS1* in response to dexamethasone application or loss of *hua2* (Fig. S2; Table S6).

### 214 **Induction of flowering of *tps1-2 GVG::TPS1* by *hua2-4* requires *FT***

215 To test whether *SOC1*, which we found to be differentially expressed in response to  
216 dexamethasone application or in *hua2-4 tps1-2 GVG::TPS1*, is a major target of *HUA2* in the  
217 regulation of flowering time in *tps1-2 GVG::TPS1* we constructed the *soc1-2 hua2-4 tps1-2*  
218 *GVG::TPS1* triple mutant. We observed that the triple mutant flowered only moderately later  
219 than the *hua2-4 tps1-2 GVG::TPS1* double mutant (Fig. 4A,B). This indicates that even  
220 though *SOC1* is significantly induced in our RNA-seq experiment in *hua2-4 tps1-2*  
221 *GVG::TPS1* (Fig. 3D; Table S6) and in RT-qPCR experiments (Fig. 4C), *SOC1* is largely  
222 dispensable for the induction of flowering in *tps1-2 GVG::TPS1* by loss of *hua2*.



223 SOC1 is known to act partially upstream of the flowering time integrator gene and florigen  
224 FT. We, therefore, decided to test if induction of flowering in *tps1-2 GVG::TPS1* by *hua2-4*  
225 required functional *FT*. Interestingly, mutation of *FT* completely abolished the effect of  
226 *hua2-4* on flowering of *tps1-2 GVG::TPS1* and the *ft-10 hua2-4 tps1-2 GVG::TPS1* triple  
227 mutant failed to flower even after four months of growth in inductive long-day conditions  
228 (Fig. 4D,E). In line with this observation, we detected increased expression of *FT* at the end  
229 of the long day (ZT 16) in the *hua2-4 tps1-2 GVG::TPS1* double mutant when compared to  
230 *tps1-2 GVG::TPS1* (Fig. 4F). It is interesting to note that *FT* expression was barely detectable  
231 at ZT 4 according to our RNA-seq analysis (Fig. S2A), which is in agreement with the  
232 diurnal expression pattern reported for *FT* (Kobayashi et al., 1999). Taken together, our  
233 genetic and molecular analyses indicate that *hua2-4* induces flowering of *tps1-2 GVG::TPS1*  
234 in part through activation of *FT*, with minor contributions of the upstream regulators *SOC1*.

### 235 **Loss of *FLC* induces flowering in *tps1-2 GVG::TPS1***

236 *HUA2* has previously been reported to regulate flowering at least in part by regulating the  
237 expression of floral repressors of the MADS-domain transcription factor family, including  
238 *FLOWERING LOCUS C (FLC)* and *FLOWERING LOCUS M (FLM)* (Doyle et al., 2005). To  
239 test if *hua2-4* induces flowering in *tps-2 GVG::TPS1* through these repressors we constructed  
240 the *flc-3 hua2-4 tps1-2 GVG::TPS1* triple mutant. We found that this triple mutant flowered  
241 moderately earlier than *hua2-4 tps1-2 GVG::TPS1* (Fig. 4G,H). In agreement with these  
242 findings, RT-qPCR analysis failed to detect *FLC* expression in the *hua2-4 tps1-2 GVG::TPS1*  
243 mutant, whereas *FLC* expression was readily detectable by RT-qPCR in *tps1-2 GVG::TPS1*  
244 (Fig. 4I).

245 Furthermore, we found that the expression of *FLC* was significantly upregulated in  
246 18-day-old *tps1-2 GVG::TPS1* seedlings when compared to Col-0 in publicly available  
247 RNA-seq data (Zacharaki et al., 2022) (Fig. 5A). This prompted us to test loss of *FLC* on its  
248 own might be sufficient to suppress the non-flowering phenotype of *tps1-2 GVG::TPS1*.  
249 Indeed, we observed that *flc-3* alone is capable of inducing flowering in the otherwise  
250 non-flowering *tps1-2 GVG::TPS1* mutant background, even though the *flc-3 tps1-2*  
251 *GVG::TPS1* double mutant flowered significantly later than wild-type and *flc-3* (Fig. 5B,C).

252 These findings suggest that the failure of *tps1-2 GVG::TPS1* to flower could in part be due to  
253 *FLC*, possibly in conjunction with other MADS-box repressors such as *MADS AFFECTING*  
254 *FLOWERING 5 (MAF5)*, the expression of which was also elevated in *tps1-2 GVG::TPS1*  
255 (Fig. 5A). In contrast, expression of *HUA2* was not changed in *tps1-2 GVG::TPS1* when  
256 compared to Col-0 according to publicly available RNA-seq data (Fig. S3).

### 257 ***hua2-4* attenuates carbon starvation responses**

258 The above data indicate that mutations in *HUA2* bypass the requirement for *TPS1* to induce  
259 flowering by reducing expression of MADS-box floral repressors and ultimately inducing  
260 floral integrator genes such as *FT* and *SOC1*. However, carbohydrate signaling has been  
261 shown to also indirectly regulate phase transitions, including flowering, in *A. thaliana*  
262 (Corbesier et al., 1998; Gibson, 2005; Xing et al., 2015; Wang et al., 2020). In part, this  
263 response is mediated by SnRK1, which in response to stress conditions such as extended  
264 darkness phosphorylates a range of proteins, including several C- and S1-class bZIP  
265 transcription factors. Activation of these transcription factors by SnRK1 induces expression  
266 of stress response genes, including *SENESCENCE5 (SEN5)* and *DARK*  
267 *INDUCED6/ASPARAGINE SYNTHASE1 (DIN6/ASNI)*, which can be used as a proxy for  
268 SnRK1 activity (Delatte et al., 2011; Dietrich et al., 2011; Mair et al., 2015). To test if loss of  
269 *HUA2* might affect flowering also more indirectly by modulating cellular energy responses,  
270 we analyzed the expression of *SEN5* and *DIN6*. Interestingly, we found that induction of  
271 *SEN5* and *DIN6* in response to extended night was strongly attenuated in *hua2-4* (Fig. 6A, B)  
272 similar to what we had previously observed in mutants affected in SnRK1 subunits  
273 (Zacharaki et al., 2022). This finding indicates that mutations in *HUA2* might modulate  
274 carbohydrate signaling more directly and that this regulation might contribute to the induction  
275 of flowering in *hua2-4 tps1-2 GVG::TPS1*. In agreement with this hypothesis, we found that  
276 expression of *SEN5* and *DIN6* was even further attenuated in three independent *hua2-4 tps1-2*  
277 *GVG::TPS1* lines (Fig. 6A,B).

278

### 279 **Discussion**

280 *Arabidopsis thaliana* *HUA2* has been reported to play a crucial role in various aspects of  
281 plant growth and development. *HUA2* was initially identified as an enhancer of the  
282 *AGAMOUS* (*AG*) allele *ag-4* (Chen and Meyerowitz, 1999). Later, *HUA2* was found to also  
283 play a role as a repressor of flowering (Doyle et al., 2005; Wang et al., 2007). At the  
284 molecular level, *HUA2* has been suggested to function as a putative transcription factor but  
285 has also been implicated in RNA processing (Cheng et al., 2003). *HUA2* is expressed  
286 throughout the whole plant growth period (Chen and Meyerowitz, 1999), indicating the  
287 importance and widespread effects on plant growth. Here, our study showed that loss of  
288 *HUA2* can partially restore flowering and embryogenesis in *tps1-2 GVG::TPS1*.

289 It is interesting to note that in our EMS suppressor screen, we did not identify mutations in  
290 any of the *HUA2-like* genes, *HULK1*, *HULK2*, and *HULK3*, present in *A. thaliana* (Jali et al.,  
291 2014). One possible explanation is that our genetic screen might not have been saturated or  
292 that *HUA2-like* genes were missed due to the relatively low sequencing coverage. However,  
293 we believe this to be rather unlikely given that our approach has recovered multiple alleles in  
294 *HUA2* (this study) as well as two SnRK1 subunits (Zacharaki et al., 2022). Furthermore,  
295 flowering time is unaffected in the *hua2-like* single mutants and *hulk2 hulk3* double mutants  
296 have been shown to be late flowering (Jali et al., 2014). Thus, it seems unlikely that mutation  
297 in any of the *HUA2-like* genes would suppress the non-flowering phenotype of *tps1-2*  
298 *GVG::TPS1*.

299 *HUA2* has been reported to exert its function in part by regulating the expression of  
300 MADS-box transcription factors (Doyle et al., 2005), named after *MINICHROMOSOME*  
301 *MAINTENANCE 1* (*MCM1*) in yeast, *AGAMOUS* (*AG*) in Arabidopsis, *DEFICIENS* (*DEF*)  
302 in Antirrhinum, and serum response factor (SRF) in humans. MADS-BOX domain  
303 transcription factors contribute to all major aspects of the life of land plants, such as female  
304 gametophyte, floral organ identity, seed development, and flowering time control (Portereiko  
305 et al., 2006; Colombo et al., 2008; Koo et al., 2010; Lee et al., 2013; Posé et al., 2013). In this  
306 context, it is interesting to note that our transcriptome and genetic analysis identified several  
307 MADS-box transcription factors to be misregulated in *tps1-2 GVG::TPS1*. In particular, the  
308 well-known floral repressors *FLOWERING LOCUS C* (*FLC*) and *MADS AFFECTING*

309 *FLOWERING5 (MAF5)* were found to be induced in *tps1-2 GVG::TPS1* compared to Col-0  
310 (Fig. 5A). Moreover, loss of *FLC* was sufficient to induce flowering in *tps1-2 GVG::TPS1*  
311 (Fig. 5B,C), suggesting that these floral repressors are partially responsible for the  
312 non-flowering phenotype of *tps1-2 GVG::TPS1*. Our transcriptome analyses further identified  
313 two MADS-box transcription factors, *SUPPRESSOR OF OVEREXPRESSION OF*  
314 *CONSTANS 1 (SOC1)* and *AGAMOUS-LIKE 24 (AGL24)*, both known to promote flowering  
315 in Arabidopsis, to be upregulated in *hua2-4 tps1-2 GVG::TPS1*.

316 The molecular mechanism by which *HUA2* regulates the expression of these MADS-box  
317 flowering time regulators is currently unclear. However, since *HUA2* localizes to the nucleus,  
318 it seems possible that *HUA2* is directly involved in regulating the expression of these genes.  
319 For example, *HUA2* could (directly) promote the expression of *FLC*, which has previously  
320 been shown to directly bind to and repress the expression of *FT* and *SOC1* (Chen and  
321 Meyerowitz, 1999; Doyle et al., 2005; Deng et al., 2011). In such a scenario, the increased  
322 expression of *FT*, *SOC1*, and *AGL24* in *hua2-4 tps1-2 GVG::TPS1* would be the result of  
323 reduced expression of floral repressors such as *FLC* and *MAF5*. However, the regulation of  
324 flowering is a very complex process full of intricate feedback loops and *HUA2* might regulate  
325 *SOC1* and *AGL24* directly, rather than indirectly. In this context, it is interesting to note that a  
326 nonfunctional *hua2* allele may compensate for the loss of *FLC* in *Ler* accession (Lemus et al.,  
327 2023). Alternatively, *HUA2* might affect the expression of these important flowering time  
328 genes through interaction with RNA Pol-II via its CID domain, which is affected by the  
329 *hua2-13* alleles (R902C). Interestingly, polymorphisms resulting in amino acid substitutions  
330 in natural accessions of *A. thaliana* have been reported for R902 and A983, but not for P455  
331 (The 1001 Genomes Consortium, 2016). Even though the molecular mechanisms underlying  
332 *HUA2* function remain elusive, our results confirm *HUA2* as a central regulator of flowering  
333 time in *Arabidopsis thaliana*.

334 We have previously identified mutations in two subunits of *SNF1-Related Kinase 1 (SnRK1)*,  
335 *KIN10* and *SNF4*, that partially restore flowering and seed set in *tps1-2 GVG::TPS1*  
336 (Zacharaki et al., 2022). Identification of these suppressor mutations was in line with the role  
337 of SnRK1 as a downstream regulator of the T6P pathway and other stresses. Antagonizing

338 SnRK1 in the regulation of energy homeostasis in plants is target of rapamycin (TOR), the  
339 activity of which is inhibited under energy-limiting conditions (Baena-González and Hanson,  
340 2017; Belda-Palazón et al., 2022). In contrast to mutations in *KIN10* and *SNF4*, mutations in  
341 *HUA2* appear, at first glance, to be bypass mutations that induce flowering independently of  
342 T6P signaling. However, and rather unexpectedly, we did observe that mutation of *HUA2*  
343 attenuated the induction of the carbon starvation markers *SEN5* and *DIN6* in response to  
344 extended night treatments (Fig. 6A, B), indicating that mutations in *HUA2* might modulate  
345 carbohydrate signaling more directly than anticipated. How exactly *HUA2* modulates carbon  
346 responses in *Arabidopsis* remains to be established. It is well-known that T6P signaling  
347 through *SnRK1* affects processes such as carbon starvation response, germination, flowering,  
348 and senescence in opposition to the TOR (target of rapamycin) pathway (Figuroa and Lunn,  
349 2016; Baena-González and Lunn, 2020). The regulatory network controlling this central  
350 metabolic hub is still not fully understood and new players are constantly added. For example,  
351 it has recently been shown that class II TPS proteins are important negative regulators of  
352 *SnRK1* (Van Leene et al., 2022).

353 Regarding a possible role of *HUA2* in integrating carbon responses, it is worth noting that  
354 flavonoid-related genes (GO:0009812) were downregulated in *tps1-2 GVG::TPS1* in  
355 response to dexamethasone application and the *hua2* mutant (Fig. 3B). This is interesting as  
356 *HUA2* is known to promote anthocyanin accumulation (Ilk et al., 2015), whereas *SnRK1* has  
357 been shown to repress sucrose-induced anthocyanin production (Li et al., 2014; Meng et al.,  
358 2018; Brouke et al., 2023). Thus, *HUA2* might constitute an important hub in coordinating  
359 metabolic responses. However, as expression of *SnRK1* subunits is not affected in *hua2-4*  
360 *tps1-2 GVG::TPS1* when compared to *tps1-2 GVG::TPS1* (Fig. S4), such a role would likely  
361 be indirect.

362 Understanding the interplay between energy metabolism, in particular *SnRK1*, TOR, and T6P  
363 signaling, and plant growth and development is of utmost importance for developing plants  
364 capable of withstanding future challenges. The suppressor mutants generated in the *tps1-2*  
365 *GVG::TPS1* background comprise an important resource in our hunt for additional factors  
366 that, like *HUA2*, link energy metabolism to plant development.

367

## 368 **Material and methods**

### 369 **Plant materials and growth conditions**

370 All T-DNA insertion mutants and transgenic lines used in this work are in the Col-0  
371 background. The *tps1-2 GVG::TPS1* line used in this work is referred to as ind-TPS1 #201 in  
372 the original publication (Dijken et al., 2004). The *hua2-4* (SALK\_032281C) was obtained  
373 from NASC and the presence of the T-DNA insertion was confirmed by PCR (Table S5).  
374 *ft-10* (GABI-Kat: 290E08) was provided by Dr. Yi Zhang, Southern University of Science  
375 and Technology, *flc-3* (Kim et al., 2006) by Dr. Liangyu Liu, Capital Normal University, and  
376 *soc1-2* (Lee et al., 2000) by Dr. Jie Luo, Chinese Academy of Sciences. *tps1-2 GVG::TPS1*  
377 *hua2-4* plants were generated by crossing and double homozygous mutants were identified by  
378 phenotyping and genotyping of F2 individuals. Higher order mutants were obtained by  
379 crossing *soc1-2*, *flc-3*, and *ft-10* mutants with the *tps1-2 GVG::TPS1 hua2-4* double mutant  
380 and homozygous triple mutants were identified in the F2 and F3 generation. All mutant  
381 genotypes were confirmed by PCR, see Table S7 for details. Plants were planted onto nutrient  
382 soil with normal water supply and grown under either long days (LD) with a photoperiod of  
383 16 hours light at 22°C and 8 hours darkness at 20°C or in short days (SD) with a photoperiod  
384 of 8 hours light at 22°C and 16 hours darkness at 20°C. Flowering time are presented as  
385 average rosette leaf number, cauline leaf number, and total leaf number.

### 386 **Genome sequencing and analysis**

387 Young leaves were used for DNA extraction for sequencing using the NovaSeq 6000  
388 Sequencing platform (Novogene). Adapters and low-quality sequences of raw reads were  
389 trimmed using Trimmomatic (Bolger et al., 2014), and the clean reads were mapped to the  
390 reference genome of Col-0 using BWA-MEM (v0.7.15) (Cingolani et al., 2012). SNP calling  
391 was performed using Genome Analysis Toolkit 4 (GATK4;  
392 <https://gatk.broadinstitute.org/hc/en-us>) with default parameters. Variants were annotated  
393 using snpEff 4.3 (Li and Durbin, 2009) based on TAIR 10 annotation. Next, we identified the  
394 protein-coding genes with multiple non-redundant mutations and found three mutant lines

395 harboring unique non-synonymous mutations in the *HUA2* gene. The method was inspired by  
396 our previous study that multiple EMS-induced mutants with unique mutation sites in the  
397 coding regions of *SnRK1* alpha subunit rescued the non-flowering phenotype of *tps1*  
398 (Zacharaki et al., 2022).

### 399 **Gene expression analysis by RNA-seq**

400 For RNA-seq analyses, plants were grown on soil for 3 weeks in LD conditions. Leaves from  
401 21-day-old *Arabidopsis thaliana* were collected, immediately snap-frozen and stored at  
402  $-80^{\circ}\text{C}$ . Total RNA was extracted using RNAPrep Pure Plant Plus Kit (Tiangen, China,  
403 DP441). RNA integrity was assessed using the RNA Nano 6000 Assay Kit on the  
404 Bioanalyzer 2100 system (Agilent Technologies, CA, USA). RNA-seq libraries were  
405 generated with three independent biological replicates and sequenced on the Illumina  
406 NovaSeq platform by Annoroad Gene Technology. The raw RNA-seq reads were quality  
407 trimmed by Trimmomatic (v 0.11.9) (Bolger et al., 2014). The qualified reads were mapped  
408 to TAIR10 version genome guided by gene annotation model using HISAT2 (v2.1.0) (Kim et  
409 al., 2015). The expression level for each gene was determined by StringTie (v1.3.4) (Pertea et  
410 al., 2016). The differential expressed genes were identified by DESeq2 (Love et al., 2014).

### 411 **RNA isolation and RT-qPCR data analysis**

412 Total RNA was extracted from Arabidopsis seedlings using the RNA Isolation Kit (Tiangen,  
413 China, DP441) according to the manufacturer's instructions. cDNA was synthesized from 3  
414  $\mu\text{g}$  total RNA in a 10  $\mu\text{l}$  reaction volume using the RevertAid Premium First Strand cDNA  
415 Synthesis Kit (Fermentas, Thermo Fisher Scientific, Rochester, NY). Quantitative real-time  
416 PCR (qRT-PCR) was performed using TB Green<sup>TM</sup> Premix Ex Taq<sup>TM</sup> II (Takara, Dalian,  
417 China). Relative gene expression was calculated using the  $2^{-\Delta\Delta\text{Ct}}$  method (Rao et al., 2013).  
418 All analyses were repeated three times. The primer used for qRT-PCR are listed in  
419 Supplemental Tables S5.

### 420 **Accession numbers**

421 Identifiers of key genes used in this study: *TPSI* (At1g78580), *HUA2* (AT5G23150), *SOCI*  
422 (AT2G45660), *FLC* (AT5G10140), *FT* (AT1G65480). RNA-seq data generated in this study  
423 have been deposited with NCBI under the BioProject PRJNA1005425.

#### 424 **Data availability**

425 The data and material that support the findings of this study are available from the  
426 corresponding author upon reasonable request.

#### 427 **Author contributions**

428 LZ and MS designed the experiments. LZ carried out the SNP detection and genetic analyses  
429 with input from VZ and MS. LZ carried out the gene expression analyses. LP and MS wrote  
430 the manuscript with contributions from all authors.

#### 431 **Acknowledgments**

432 The authors would like to thank Ruben M. Benstein and Vanessa Wahl for discussion and  
433 comments on the manuscript. This work was supported by grants from the National Natural  
434 Science Foundation of China (32071504 and 32371577) YW, the fundamental research funds  
435 for the central universities (BLX202170) to LZ, and the DFG (SPP1530: SCHM1560/8-1, 8-2)  
436 and the Swedish Research Council (2015-04617) to MS.



## 437 **References**

- 438 **Abe M, Kobayashi Y, Yamamoto S, Daimon Y, Yamaguchi A, Ikeda Y, Ichinoki H,**  
439 **Notaguchi M, Goto K, Araki T** (2005) FD, a bZIP protein mediating signals from  
440 the floral pathway integrator FT at the shoot apex. *Science* **309**: 1052-1056
- 441 **Baena-González E, Hanson J** (2017) Shaping plant development through the SnRK1-TOR  
442 metabolic regulators. *Curr Opin Plant Biol* **35**: 152-157
- 443 **Baena-González E, Lunn JE** (2020) SnRK1 and trehalose 6-phosphate - two ancient  
444 pathways converge to regulate plant metabolism and growth. *Curr Opin Plant Biol* **55**:  
445 52-59
- 446 **Belda-Palazón B, Costa M, Beeckman T, Rolland F, Baena-González E** (2022) ABA  
447 represses TOR and root meristem activity through nuclear exit of the SnRK1 kinase.  
448 *Proc Natl Acad Sci USA* **119**: 1-3
- 449 **Blázquez MA, Santos E, Flores CL, Martínez-Zapater JM, Salinas J, Gancedo C** (1998)  
450 Isolation and molecular characterization of the Arabidopsis TPS1 gene, encoding  
451 trehalose-6-phosphate synthase. *Plant J* **13**: 685-689
- 452 **Blázquez MA, Weigel D** (2000) Integration of floral inductive signals in Arabidopsis. *Nature*  
453 **404**: 889-892
- 454 **Bolger AM, Lohse M, Usadel B** (2014) Trimmomatic: a flexible trimmer for Illumina  
455 sequence data. *Bioinformatics* **30**: 2114-2120
- 456 **Broucke E, Dang TTV, Li Y, Hulsmans S, Van Leene J, De Jaeger G, Hwang I, Wim**  
457 **VdE, Rolland F** (2023) SnRK1 inhibits anthocyanin biosynthesis through both  
458 transcriptional regulation and direct phosphorylation and dissociation of the  
459 MYB/bHLH/TTG1 MBW complex. *Plant J* **115**: 1193-1213
- 460 **Cabib E, Leloir LF** (1958) THE BIOSYNTHESIS OF TREHALOSE PHOSPHATE. *Journal*  
461 *of Biological Chemistry* **231**: 259-275
- 462 **Chary SN, Hicks GR, Choi YG, Carter D, Raikhel NV** (2008) Trehalose-6-phosphate  
463 synthase/phosphatase regulates cell shape and plant architecture in Arabidopsis. *Plant*  
464 *Physiol* **146**: 97-107
- 465 **Chen X, Meyerowitz EM** (1999) HUA1 and HUA2 are two members of the floral homeotic  
466 AGAMOUS pathway. *Mol Cell* **3**: 349-360
- 467 **Cheng Y, Kato N, Wang W, Li J, Chen X** (2003) Two RNA binding proteins, HEN4 and  
468 HUA1, act in the processing of AGAMOUS pre-mRNA in Arabidopsis thaliana. *Dev*  
469 *Cell* **4**: 53-66
- 470 **Cho LH, Yoon J, An G** (2017) The control of flowering time by environmental factors. *Plant*  
471 *J* **90**: 708-719
- 472 **Cingolani P, Platts A, Wang le L, Coon M, Nguyen T, Wang L, Land SJ, Lu X, Ruden**  
473 **DM** (2012) A program for annotating and predicting the effects of single nucleotide  
474 polymorphisms, SnpEff: SNPs in the genome of *Drosophila melanogaster* strain  
475 w1118; iso-2; iso-3. *Fly (Austin)* **6**: 80-92
- 476 **Collani S, Neumann M, Yant L, Schmid M** (2019) FT Modulates Genome-Wide  
477 DNA-Binding of the bZIP Transcription Factor FD. *Plant Physiol* **180**: 367-380
- 478 **Colombo M, Masiero S, Vanzulli S, Lardelli P, Kater MM, Colombo L** (2008) AGL23, a  
479 type I MADS-box gene that controls female gametophyte and embryo development in

- 480 Arabidopsis. *Plant J* **54**: 1037-1048
- 481 **Corbesier L, Lejeune P, Bernier G** (1998) The role of carbohydrates in the induction of  
482 flowering in *Arabidopsis thaliana*: comparison between the wild type and a starchless  
483 mutant. *Planta* **206**: 131-137
- 484 **Delatte TL, Sedijani P, Kondou Y, Matsui M, de Jong GJ, Somsen GW,**  
485 **Wiese-Klinkenberg A, Primavesi LF, Paul MJ, Schluempmann H** (2011) Growth  
486 arrest by trehalose-6-phosphate: an astonishing case of primary metabolite control  
487 over growth by way of the SnRK1 signaling pathway. *Plant Physiol* **157**: 160-174
- 488 **Delorge I, Figueroa CM, Feil R, Lunn JE, Van Dijck P** (2015) Trehalose-6-phosphate  
489 synthase 1 is not the only active TPS in *Arabidopsis thaliana*. *Biochem J* **466**:  
490 283-290
- 491 **Deng W, Ying H, Helliwell CA, Taylor JM, Peacock WJ, Dennis ES** (2011) FLOWERING  
492 LOCUS C (FLC) regulates development pathways throughout the life cycle of  
493 *Arabidopsis*. *Proc Natl Acad Sci USA* **108**: 6680-6685
- 494 **Dietrich K, Weltmeier F, Ehlert A, Weiste C, Stahl M, Harter K, Dröge-Laser W** (2011)  
495 Heterodimers of the *Arabidopsis* transcription factors bZIP1 and bZIP53 reprogram  
496 amino acid metabolism during low energy stress. *Plant Cell* **23**: 381-395
- 497 **Doyle MR, Bizzell CM, Keller MR, Michaels SD, Song J, Noh YS, Amasino RM** (2005)  
498 HUA2 is required for the expression of floral repressors in *Arabidopsis thaliana*. *Plant*  
499 *J* **41**: 376-385
- 500 **Eastmond PJ, van Dijken AJ, Spielman M, Kerr A, Tissier AF, Dickinson HG, Jones JD,**  
501 **Smeekens SC, Graham IA** (2002) Trehalose-6-phosphate synthase 1, which  
502 catalyses the first step in trehalose synthesis, is essential for *Arabidopsis* embryo  
503 maturation. *Plant J* **29**: 225-235
- 504 **Figueroa CM, Lunn JE** (2016) A Tale of Two Sugars: Trehalose 6-Phosphate and Sucrose.  
505 *Plant Physiol* **172**: 7-27
- 506 **Gibson SI** (2005) Control of plant development and gene expression by sugar signaling. *Curr*  
507 *Opin Plant Biol* **8**: 93-102
- 508 **Goddijn OJ, van Dun K** (1999) Trehalose metabolism in plants. *Trends Plant Sci* **4**:  
509 315-319
- 510 **Ilk N, Ding J, Ihnatowicz A, Koornneef M, Reymond M** (2014) Natural variation for  
511 anthocyanin accumulation under high-light and low-temperature stress is attributable  
512 to the ENHANCER OF AG-4 2 (HUA2) locus in combination with PRODUCTION  
513 OF ANTHOCYANIN PIGMENT1 (PAP1) and PAP2. *New Phytol* **206**: 422-435
- 514 **Jali SS, Rosloski SM, Janakirama P, Steffen JG, Zhurov V, Berleth T, Clark RM, Grbic**  
515 **V** (2014) A plant-specific HUA2-LIKE (HULK) gene family in *Arabidopsis thaliana*  
516 is essential for development. *Plant J* **80**: 242-254
- 517 **Jung JH, Ju Y, Seo PJ, Lee JH, Park CM** (2012) The SOC1-SPL module integrates  
518 photoperiod and gibberellic acid signals to control flowering time in *Arabidopsis*.  
519 *Plant J* **69**: 577-588
- 520 **Kardailsky I, Shukla VK, Ahn JH, Dagenais N, Christensen SK, Nguyen JT, Chory J,**  
521 **Harrison MJ, Weigel D** (1999) Activation tagging of the floral inducer FT. *Science*  
522 **286**: 1962-1965
- 523 **Kim D, Langmead B, Salzberg SL** (2015) HISAT: a fast spliced aligner with low memory

- 524 requirements. *Nat Methods* **12**: 357-360
- 525 **Kobayashi Y, Kaya H, Goto K, Iwabuchi M, Araki T** (1999) A pair of related genes with  
526 antagonistic roles in mediating flowering signals. *Science* **286**: 1960-1962
- 527 **Kobayashi Y, Weigel D** (2007) Move on up, it's time for change--mobile signals controlling  
528 photoperiod-dependent flowering. *Genes Dev* **21**: 2371-2384
- 529 **Koo SC, Bracko O, Park MS, Schwab R, Chun HJ, Park KM, Seo JS, Grbic V,**  
530 **Balasubramanian S, Schmid M, Godard F, Yun DJ, Lee SY, Cho MJ, Weigel D,**  
531 **Kim MC** (2010) Control of lateral organ development and flowering time by the  
532 *Arabidopsis thaliana* MADS-box Gene AGAMOUS-LIKE6. *Plant J* **62**: 807-816
- 533 **Lee J, Lee I** (2010) Regulation and function of SOC1, a flowering pathway integrator. *J Exp*  
534 *Bot* **61**: 2247-2254
- 535 **Lee JH, Ryu HS, Chung KS, Posé D, Kim S, Schmid M, Ahn JH** (2013) Regulation of  
536 temperature-responsive flowering by MADS-box transcription factor repressors.  
537 *Science* **342**: 628-632
- 538 **Lemus T, Mason GA, Bubb KL, Alexandre CM, Queitsch C, Cuperus JT** (2023) AGO1  
539 and HSP90 buffer different genetic variants in *Arabidopsis thaliana*. *Genetics* 223:  
540 iyac163
- 541 **Leyman B, Van Dijck P, Thevelein JM** (2001) An unexpected plethora of trehalose  
542 biosynthesis genes in *Arabidopsis thaliana*. *Trends Plant Sci* **6**: 510-513
- 543 **Li H, Durbin R** (2009) Fast and accurate short read alignment with Burrows-Wheeler  
544 transform. *Bioinformatics* **25**: 1754-1760
- 545 **Li Y, Van den Ende W, Rolland F** (2014) Sucrose induction of anthocyanin biosynthesis is  
546 mediated by DELLA. *Mol Plant* **7**: 570-572
- 547 **Liljegren SJ, Gustafson-Brown C, Pinyopich A, Ditta GS, Yanofsky MF** (1999)  
548 Interactions among APETALA1, LEAFY, and TERMINAL FLOWER1 specify  
549 meristem fate. *Plant Cell* **11**: 1007-1018
- 550 **Love MI, Huber W, Anders S** (2014) Moderated estimation of fold change and dispersion  
551 for RNA-seq data with DESeq2. *Genome Biology* **15**: 1-21
- 552 **Lunn JE** (2007) Gene families and evolution of trehalose metabolism in plants. *Funct Plant*  
553 *Biol* **34**: 550-563
- 554 **Lunn JE, Feil R, Hendriks JH, Gibon Y, Morcuende R, Osuna D, Scheible WR, Carillo**  
555 **P, Hajirezaei MR, Stitt M** (2006) Sugar-induced increases in trehalose 6-phosphate  
556 are correlated with redox activation of ADPglucose pyrophosphorylase and higher  
557 rates of starch synthesis in *Arabidopsis thaliana*. *Biochem J* **397**: 139-148
- 558 **Mair A, Pedrotti L, Wurzinger B, Anrather D, Simeunovic A, Weiste C, Valerio C,**  
559 **Dietrich K, Kirchler T, Naegele T, Vicente Carbajosa J, Hanson J,**  
560 **Baena-Gonzalez E, Chaban C, Weckwerth W, Droege-Laser W, Teige M** (2015)  
561 SnRK1-triggered switch of bZIP63 dimerization mediates the low-energy response in  
562 plants. *Elife* **4**: 1-33
- 563 **Martins MC, Hejazi M, Fettke J, Steup M, Feil R, Krause U, Arrivault S, Vosloh D,**  
564 **Figueroa CM, Ivakov A, Yadav UP, Piques M, Metzner D, Stitt M, Lunn JE**  
565 (2013) Feedback inhibition of starch degradation in *Arabidopsis* leaves mediated by  
566 trehalose 6-phosphate. *Plant Physiol* **163**: 1142-1163
- 567 **Mathieu J, Warthmann N, Kuttner F, Schmid M** (2007) Export of FT protein from phloem

- 568 companion cells is sufficient for floral induction in *Arabidopsis*. *Curr Biol* **17**:  
569 1055-1060
- 570 **Meng LS, Xu MK, Wan W, Yu F, Li C, Wang JY, Wei ZQ, Lv MJ, Cao XY, Li ZY, Jiang**  
571 **JH** (2018) Sucrose signaling regulates anthocyanin biosynthesis through a MAPK  
572 cascade in *Arabidopsis thaliana*. *Genetics* **210**: 607–619
- 573 **Moon J, Lee H, Kim M, Lee I** (2005) Analysis of flowering pathway integrators in  
574 *Arabidopsis*. *Plant Cell Physiol* **46**: 292-299
- 575 **Pertea M, Kim D, Pertea GM, Leek JT, Salzberg SL** (2016) Transcript-level expression  
576 analysis of RNA-seq experiments with HISAT, StringTie and Ballgown. *Nat Protoc* **11**:  
577 1650-1667
- 578 **Portereiko MF, Lloyd A, Steffen JG, Punwani JA, Otsuga D, Drews GN** (2006) AGL80 is  
579 required for central cell and endosperm development in *Arabidopsis*. *Plant Cell* **18**:  
580 1862-1872
- 581 **Posé D, Verhage L, Ott F, Yant L, Mathieu J, Angenent GC, Immink RG, Schmid M**  
582 (2013) Temperature-dependent regulation of flowering by antagonistic FLM variants.  
583 *Nature* **503**: 414-417
- 584 **Ramon M, De Smet I, Vandesteene L, Naudts M, Leyman B, Van Dijck P, Rolland F,**  
585 **Beeckman T, Thevelein JM** (2009) Extensive expression regulation and lack of  
586 heterologous enzymatic activity of the Class II trehalose metabolism proteins from  
587 *Arabidopsis thaliana*. *Plant Cell Environ* **32**: 1015-1032
- 588 **Romera-Branchat M, Andrés F, Coupland G** (2014) Flowering responses to seasonal cues:  
589 what's new? *Curr Opin Plant Biol* **21**: 120-127
- 590 **Singh V, Louis J, Ayre BG, Reese JC, Pegadaraju V, Shah J** (2011) TREHALOSE  
591 PHOSPHATE SYNTHASE11-dependent trehalose metabolism promotes *Arabidopsis*  
592 *thaliana* defense against the phloem-feeding insect *Myzus persicae*. *Plant J* **67**: 94-104
- 593 **Srikanth A, Schmid M** (2011) Regulation of flowering time: all roads lead to Rome. *Cell*  
594 *Mol Life Sci* **68**: 2013-2037
- 595 **Taoka K, Ohki I, Tsuji H, Furuita K, Hayashi K, Yanase T, Yamaguchi M, Nakashima C,**  
596 **Purwestri YA, Tamaki S, Ogaki Y, Shimada C, Nakagawa A, Kojima C,**  
597 **Shimamoto K** (2011) 14-3-3 proteins act as intracellular receptors for rice Hd3a  
598 florigen. *Nature* **476**: 332-335
- 599 **The 1001 Genomes Consortium** (2016) 1,135 genomes reveal the global pattern of  
600 polymorphism in *Arabidopsis thaliana*. *Cell* **166**: 481-491.
- 601 **Tian L, Xie Z, Lu C, Hao X, Wu S, Huang Y, Li D, Chen L** (2019) The  
602 trehalose-6-phosphate synthase TPS5 negatively regulates ABA signaling in  
603 *Arabidopsis thaliana*. *Plant Cell Rep* **38**: 869-882
- 604 **Turck F, Fornara F, Coupland G** (2008) Regulation and identity of florigen: FLOWERING  
605 LOCUS T moves center stage. *Annu Rev Plant Biol* **59**: 573-594
- 606 **Van Dijck P, Mascorro-Gallardo JO, De Bus M, Royackers K, Iturriaga G, Thevelein**  
607 **JM** (2002) Truncation of *Arabidopsis thaliana* and *Selaginella lepidophylla*  
608 trehalose-6-phosphate synthase unlocks high catalytic activity and supports high  
609 trehalose levels on expression in yeast. *Biochem J* **366**: 63-71
- 610 **van Dijken AJ, Schluepmann H, Smeekens SC** (2004) *Arabidopsis* trehalose-6-phosphate  
611 synthase 1 is essential for normal vegetative growth and transition to flowering. *Plant*

- 612            *Physiol* **135**: 969-977
- 613 **Van Leene J, Eeckhout D, Gadeyne A, Matthijs C, Han C, De Winne N, Persiau G, Van**
- 614 **De Slijke E, Persyn F, Mertens T, Smagge W, Crepin N, Broucke E, Van**
- 615 **Damme D, Pleskot R, Rolland F, De Jaeger G** (2022) Mapping of the plant SnRK1
- 616 kinase signalling network reveals a key regulatory role for the class II T6P
- 617 synthase-like proteins. *Nat Plants* **8**: 1245-1261
- 618 **Vandesteene L, López-Galvis L, Vanneste K, Feil R, Maere S, Lammens W, Rolland F,**
- 619 **Lunn JE, Avonce N, Beeckman T, Van Dijck P** (2012) Expansive evolution of the
- 620 trehalose-6-phosphate phosphatase gene family in *Arabidopsis*. *Plant Physiol* **160**:
- 621 884-896
- 622 **Wahl V, Ponnu J, Schlereth A, Arrivault S, Langenecker T, Franke A, Feil R, Lunn JE,**
- 623 **Stitt M, Schmid M** (2013) Regulation of flowering by trehalose-6-phosphate
- 624 signaling in *Arabidopsis thaliana*. *Science* **339**: 704-707
- 625 **Wang M, Zang L, Jiao F, Perez-Garcia M-D, Ogé L, Hamama L, Le Gourrierec J, Sakr**
- 626 **S, Chen J** (2020) Sugar Signaling and Post-transcriptional Regulation in Plants: An
- 627 Overlooked or an Emerging Topic? *Front Plant Sci* **11**: 578096
- 628 **Wang Q, Sajja U, Rosloski S, Humphrey T, Kim MC, Bomblies K, Weigel D, Grbic V**
- 629 (2007) HUA2 caused natural variation in shoot morphology of *A. thaliana*. *Curr Biol*
- 630 **17**: 1513-1519
- 631 **Weigel D, Nilsson O** (1995) A developmental switch sufficient for flower initiation in diverse
- 632 plants. *Nature* **377**: 495-500
- 633 **Wigge PA, Kim MC, Jaeger KE, Busch W, Schmid M, Lohmann JU, Weigel D** (2005)
- 634 Integration of spatial and temporal information during floral induction in *Arabidopsis*.
- 635 *Science* **309**: 1056-1059
- 636 **Xing LB, Zhang D, Li YM, Shen YW, Zhao CP, Ma JJ, An N, Han MY** (2015)
- 637 Transcription Profiles Reveal Sugar and Hormone Signaling Pathways Mediating
- 638 Flower Induction in Apple (*Malus domestica* Borkh.). *Plant Cell Physiol* **56**:
- 639 2052-2068
- 640 **Yadav UP, Ivakov A, Feil R, Duan GY, Walther D, Giavalisco P, Piques M, Carillo P,**
- 641 **Hubberten HM, Stitt M, Lunn JE** (2014) The sucrose-trehalose 6-phosphate (Tre6P)
- 642 nexus: specificity and mechanisms of sucrose signalling by Tre6P. *J Exp Bot* **65**:
- 643 1051-1068
- 644 **Yan W, Chen D, Kaufmann K** (2016) Molecular mechanisms of floral organ specification
- 645 by MADS domain proteins. *Curr Opin Plant Biol* **29**: 154-162
- 646 **Yoo SK, Chung KS, Kim J, Lee JH, Hong SM, Yoo SJ, Yoo SY, Lee JS, Ahn JH** (2005)
- 647 CONSTANS activates SUPPRESSOR OF OVEREXPRESSION OF CONSTANS 1
- 648 through FLOWERING LOCUS T to promote flowering in *Arabidopsis*. *Plant Physiol*
- 649 **139**: 770-778
- 650 **Zacharaki V, Ponnu J, Crepin N, Langenecker T, Haggmann J, Skorzinski N,**
- 651 **Musialak-Lange M, Wahl V, Rolland F, Schmid M** (2022) Impaired KIN10
- 652 function restores developmental defects in the *Arabidopsis* trehalose 6-phosphate
- 653 synthase1 (*tps1*) mutant. *New Phytol* **235**: 220-233

## 654 **Figure legends**

655 **Figure 1. EMS-induced mutations in *HUA2* induce flowering in *tps1-2 GVG::TPS1***  
656 **background.** **A)** Schematic drawing of *HUA2* indicating the position and the amino acid  
657 changes caused by the EMS-induced mutations *hua2-11* (P455S), *hua2-12* (R902C), and  
658 *hua2-13* (A983T). **B)** Phenotype of 9-week-old *tps1-2 GVG::TPS1*, *hua2-11 tps1-2*  
659 *GVG::TPS1*, *hua2-12 tps1-2 GVG::TPS1*, *hua2-13 tps1-2 GVG::TPS1* and wild-type Col-0  
660 plants grown in LD at 23°C. **C)** Flowering time of genotypes is given as total leaf number  
661 (rosette (grey); cauline leaves (white)) determined after bolting. Error bars represent the  
662 standard deviation. ANOVA Tukey's multiple comparisons test was applied, and letters  
663 represent the statistical differences among genotypes ( $P < 0.001$ ).

664

665 **Figure 2. A T-DNA insertion in *HUA2* partially rescues the flowering time phenotype of**  
666 ***tps1-2 GVG::TPS1*.** **A)** Schematic drawing of the *HUA2* locus indicating the position of the  
667 T-DNA insertion (SALK\_032281C) in the 2<sup>nd</sup> intron in *hua2-4*. **B-C)** Phenotypic analysis (**B**)  
668 and flowering time(**C**) of 9-week-old wild-type Col-0, *tps1-2 GVG::TPS1*, *hua2-4 tps1-2*  
669 *GVG::TPS1* and *hua2-4* plants grown in LD at 23°C. Flowering time was scored as total leaf  
670 number (rosette (grey) and cauline leaves (white)) after bolting. Error bars represent the  
671 standard deviation. ANOVA Tukey's multiple comparisons test was applied, and letters  
672 represent the statistical differences among genotypes ( $P < 0.001$ ).

673

674 **Figure 3. Characterization of *hua2-4 tps1-2 GVG::TPS1* transcriptome.** **A)** 4-way Venn  
675 diagram of genes that are differentially expressed in *tps1-2 GVG::TPS1* in response to  
676 dexamethasone treatment and/or differentially expressed in *hua2-4 tps1-2 GVG::TPS1* when  
677 compared to *tps1-2 GVG::TPS1*. **B)** GO analysis of 412 genes downregulated in *tps1-2*  
678 *GVG::TPS1* in response to dexamethasone treatment and in *hua2-4 tps1-2 GVG::TPS1*. **C)**  
679 GO analysis of 243 genes upregulated in *tps1-2 GVG::TPS1* in response to dexamethasone  
680 treatment and in *hua2-4 tps1-2 GVG::TPS1*. **D)** Relative expression of *AGL24* and *SOC1* in  
681 *tps1-2 GVG::TPS1* (white), *tps1-2 GVG::TPS1* treated with dexamethasone (black), and  
682 *hua2-4 tps1-2 GVG::TPS1* (grey). *AGL24* and *SOC1* are significantly differentially expressed.

683 Error bars indicate the standard deviation. ANOVA Tukey's multiple comparisons test was  
684 applied, and letters represent the statistical differences among genotypes ( $P < 0.001$ ).

685

686 **Figure 4. Genetic interactions between *tps1-2*, *hua2-4*, and floral regulators *SOC1*, *FT*,**  
687 **and *FLC*. A-B** Phenotypes (A) and flowering time (B) of Col-0, *hua2-4*, *tps-2 GVG::TPS1*,  
688 and *soc1-2* mutant combinations. **D-E** Phenotypes (D) and flowering time (E) of Col-0,  
689 *hua2-4*, *tps-2 GVG::TPS1*, and *ft-10* mutant combinations. **G-H** Phenotypes (G) and  
690 flowering time (H) of Col-0, *hua2-4*, *tps-2 GVG::TPS1*, and *frc-3* mutant combinations.  
691 Flowering time (B, E, H) was scored as total leaf number (rosette (grey) and cauline leaves  
692 (white)) after bolting. **C, F, I** Relative expression of *SOC1* (C), *FT* (F), and *FLC* (I) in  
693 *tps1-2 GVG::TPS1* and *hua2-4 tps-2 GVG::TPS1*. Gene expression was determined by  
694 RT-qPCR at the end of the long day (ZT 16). Error bars represent the standard deviation.  
695 ANOVA Tukey's multiple comparisons test was applied, and letters represent the statistical  
696 differences among genotypes ( $P < 0.001$ ).

697

698 **Figure 5. Loss of *FLC* rescues the non-flowering phenotype of *tps1-2 GVG::TPS1*. A)**  
699 VST expression estimates for MADS-box floral repressors in 18-day-old plants. RNA-seq  
700 expression data retrieved from Zacharaki et al., 2022. Columns indicate mean VST  
701 expression estimates as implemented in DEseq2 calculated from three individual biological  
702 replicates per genotype. Circles indicate expression estimates for individual biological  
703 replicates. Asterisks indicate differential gene expression with a statistical significance of  
704  $P_{adj} < 0.01$ . **B-C** Phenotypes (B) and total leaf number (C) of Col-0, *tps1-2 GVG::TPS1*,  
705 *frc-3*, and *frc-3 tps1-2 GVG::TPS1* double mutant. Flowering time was scored as total leaf  
706 number (rosette (grey) and cauline leaves (white)) after bolting. Error bars represent the  
707 standard deviation. ANOVA Tukey's multiple comparisons test was applied, and letters  
708 represent the statistical differences among genotypes ( $P < 0.001$ ).

709

710 **Figure 6. Expression of SnRK1 target genes *SEN5* and *DIN6* in *hua2-4* and *hua2-4***  
711 ***tps1-2 GVG::TPS1* double mutant. A-B** Induction of *SEN5* (A) and *DIN6* (B) in response  
712 to extended night is attenuated in 14-day-old of *hua2-4* single mutant and three independent

713 lines of the *hua2-4 tps1-2 GVG::TPS1* double mutant. Plants were grown for 14 days in LD  
714 (grey) before being exposed to a single extended night (12h additional darkness; black). LD,  
715 long days. Error bars represent the standard deviation. ANOVA Tukey's multiple comparisons  
716 test was applied, and letters represent the statistical differences among genotypes ( $P < 0.001$ ).



## 717 **Supplemental Material**

- 718 **Supplemental Figure S1** Relative expression of *HUA2* in *tps1-2 GVG::TPS1* treated  
719 with dexamethasone or untreated.
- 720 **Supplemental Figure S2** Relative expression of important floral regulators in *tps1-2*  
721 *GVG::TPS1*, *tps1-2 GVG::TPS1* treated with dexamethasone,  
722 and *hua2-4 tps1-2 GVG::TPS1*.
- 723 **Supplemental Figure S3** VST expression estimates for *HUA2* in 18-day-old plants.
- 724 **Supplemental Figure S4** Relative expression of SnRK1 subunits in *tps1-2*  
725 *GVG::TPS1*, *tps1-2 GVG::TPS1* treated with dexamethasone,  
726 and *hua2-4 tps1-2 GVG::TPS1*.
- 727 **Supplemental Table S1** Number of SNPs identified in individual suppressor mutants.
- 728 **Supplemental Table S2** Number of SNPs identified in EMS suppressor lines carrying  
729 mutations in *HUA2*.
- 730 **Supplemental Table S3** EMS suppressor lines bearing non-synonymous mutations in  
731 *HUA2*.
- 732 **Supplemental Table S4** GO analysis of 412 genes downregulated in *tps1-2*  
733 *GVG::TPS1* in response to dexamethasone application and in  
734 *hua2-4*.
- 735 **Supplemental Table S5** GO analysis of 243 genes induced in *tps1-2 GVG::TPS1* in  
736 response to dexamethasone application and in *hua2-4*.
- 737 **Supplemental Table S6** Expression of flowering time genes in *hua2-4 tps1-2*  
738 *GVG::TPS1* and *tps1-2 GVG::TPS1*.
- 739 **Supplemental Table S7** List of oligonucleotides used in this study.

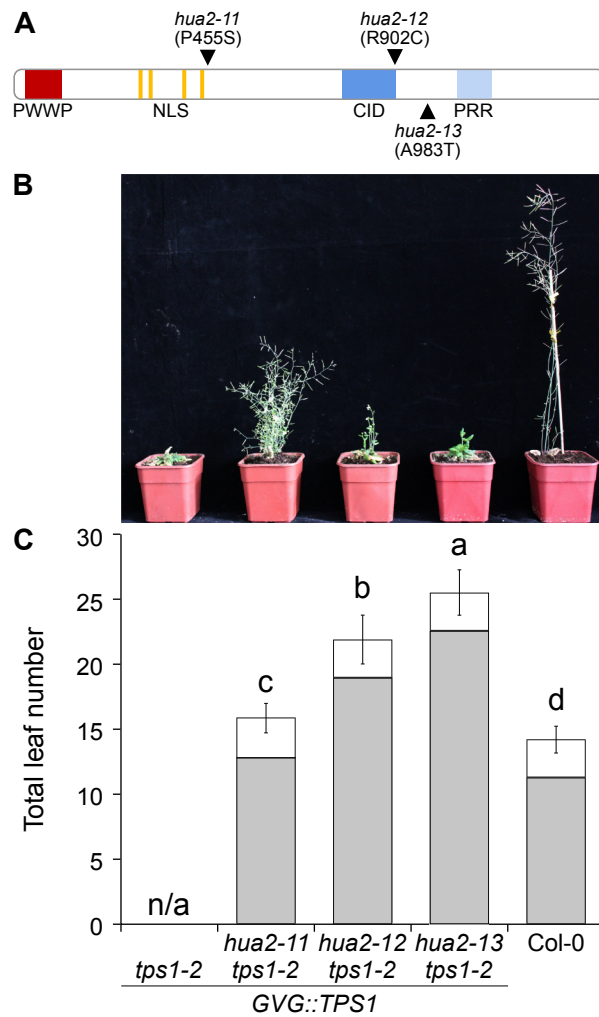

**Figure 1. EMS-induced mutations in *HUA2* induce flowering in *tps1-2 GVG::TPS1* background.** **A)** Schematic drawing of *HUA2* indicating the position and the amino acid changes caused by the EMS-induced mutations *hua2-11* (P455S), *hua2-12* (R902C), and *hua2-13* (A983T). **B)** Phenotype of 9-week-old *tps1-2 GVG::TPS1*, *hua2-11 tps1-2 GVG::TPS1*, *hua2-12 tps1-2 GVG::TPS1*, *hua2-13 tps1-2 GVG::TPS1* and wild-type Col-0 plants grown in LD at 23°C. **C)** Flowering time of genotypes is given as total leaf number (rosette (grey); cauline leaves (white)) determined after bolting. Error bars represent the standard deviation. ANOVA Tukey's multiple comparisons test was applied, and letters represent the statistical differences among genotypes ( $P < 0.001$ ).

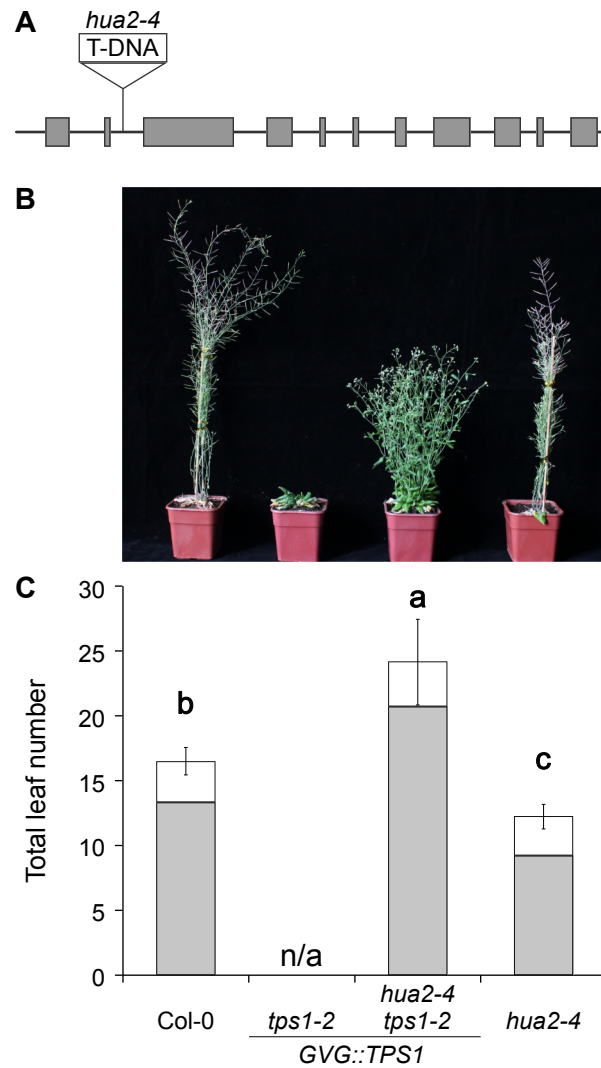

**Figure 2. A T-DNA insertion in *HUA2* partially rescues the flowering time phenotype of *tps1-2 GVG::TPS1*.** **A)** Schematic drawing of the *HUA2* locus indicating the position of the T-DNA insertion (SALK\_032281C) in the 2<sup>nd</sup> intron in *hua2-4*. **B-C)** Phenotypic analysis (**B**) and flowering time (**C**) of 9-week-old wild-type Col-0, *tps1-2 GVG::TPS1*, *hua2-4 tps1-2 GVG::TPS1* and *hua2-4* plants grown in LD at 23°C. Flowering time was scored as total leaf number (rosette (grey) and cauline leaves (white)) after bolting. Error bars represent the standard deviation. ANOVA Tukey's multiple comparisons test was applied, and letters represent the statistical differences among genotypes ( $P < 0.001$ ).

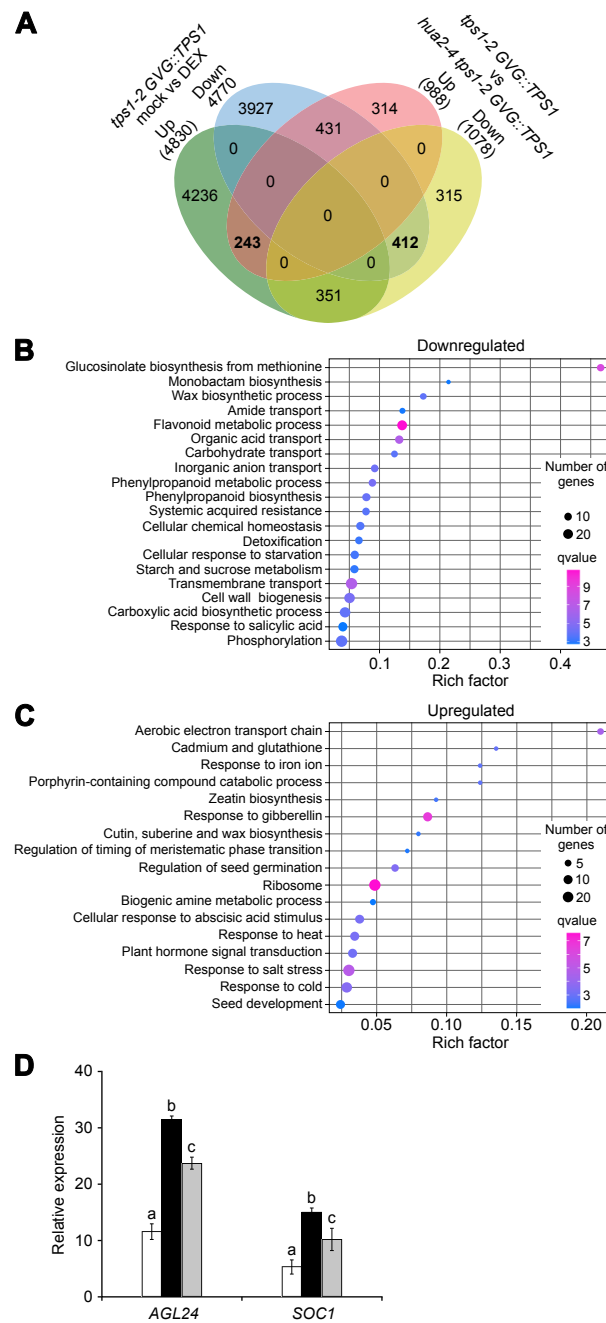

**Figure 3. Characterization of *hua2-4 tps1-2 GVG::TPS1* transcriptome.** **A)** 4-way Venn diagram of genes that are differentially expressed in *tps1-2 GVG::TPS1* in response to dexamethasone treatment and/or differentially expressed in *hua2-4 tps1-2 GVG::TPS1* when compared to *tps1-2 GVG::TPS1*. **B)** GO analysis of 412 genes downregulated in *tps1-2 GVG::TPS1* in response to dexamethasone treatment and in *hua2-4 tps1-2 GVG::TPS1*. **C)** GO analysis of 243 genes upregulated in *tps1-2 GVG::TPS1* in response to dexamethasone treatment and in *hua2-4 tps1-2 GVG::TPS1*. **D)** Relative expression of *AGL24* and *SOC1* in *tps1-2 GVG::TPS1* (white), *tps1-2 GVG::TPS1* treated with dexamethasone (black), and *hua2-4 tps1-2 GVG::TPS1* (grey). *AGL24* and *SOC1* are significantly differentially expressed. Error bars indicate the standard deviation. ANOVA Tukey's multiple comparisons test was applied, and letters represent the statistical differences among genotypes ( $P < 0.001$ ).

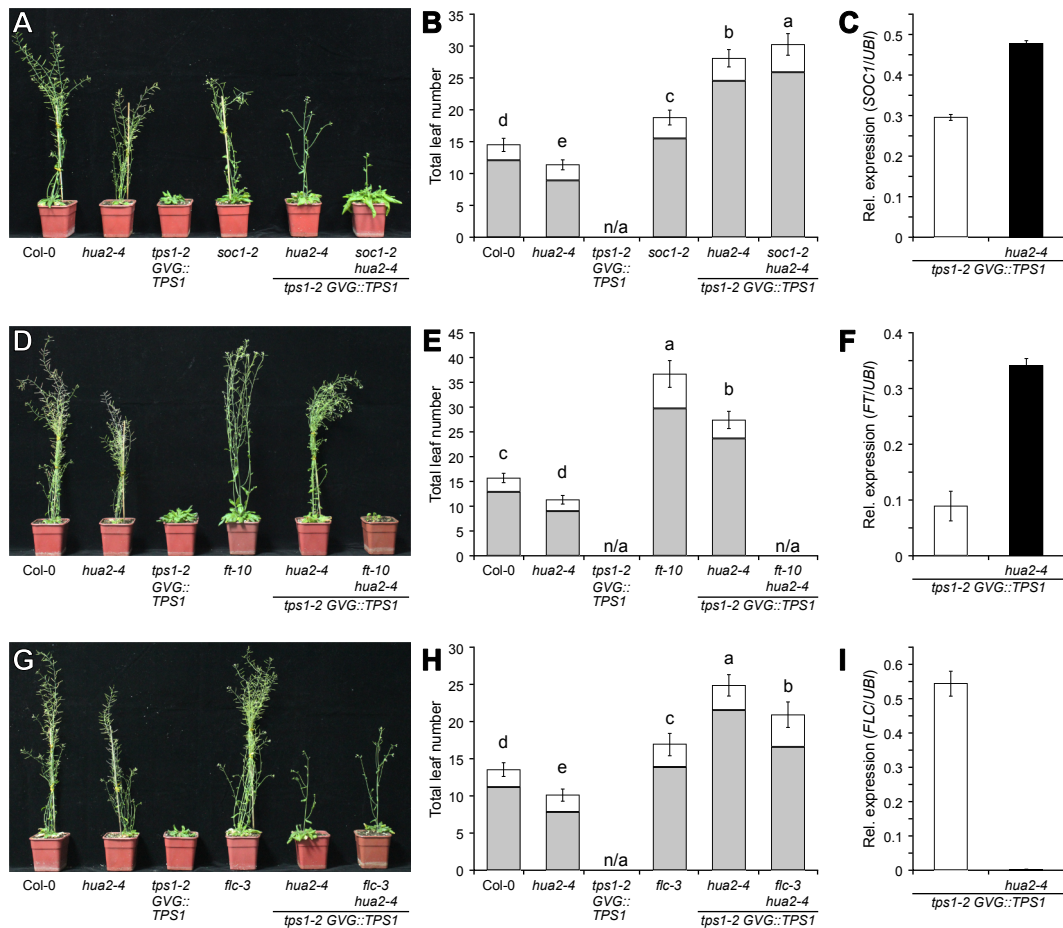

**Figure 4. Genetic interactions between *tps1-2*, *hua2-4*, and floral regulators *SOC1*, *FT*, and *FLC*.** A-B) Phenotypes (A) and flowering time (B) of Col-0, *hua2-4*, *tps-2 GVG::TPS1*, and *soc1-2* mutant combinations. D-E) Phenotypes (D) and flowering time (E) of Col-0, *hua2-4*, *tps-2 GVG::TPS1*, and *ft-10* mutant combinations. G-H) Phenotypes (G) and flowering time (H) of Col-0, *hua2-4*, *tps-2 GVG::TPS1*, and *flc-3* mutant combinations. Flowering time (B, E, H) was scored as total leaf number (rosette (grey) and cauline leaves (white)) after bolting. C, F, I) Relative expression of *SOC1* (C), *FT* (F), and *FLC* (I) in *tps1-2 GVG::TPS1* and *hua2-4 tps1-2 GVG::TPS1*. Gene expression was determined by RT-qPCR at the end of the long day (ZT 16). Error bars represent the standard deviation. ANOVA Tukey's multiple comparisons test was applied, and letters represent the statistical differences among genotypes ( $P < 0.001$ ).

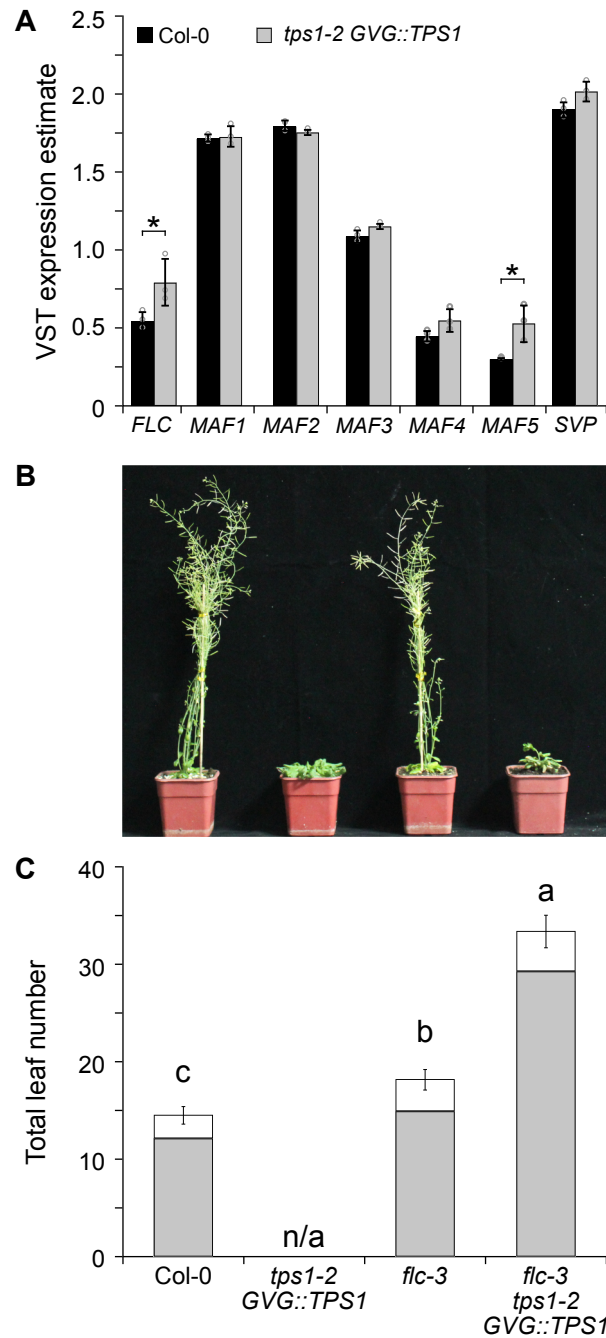

**Figure 5. Loss of *FLC* rescues the non-flowering phenotype of *tps1-2 GVG::TPS1*.** **A)** VST expression estimates for MADS-box floral repressors in 18-day-old plants. RNA-seq expression data retrieved from Zacharaki et al., 2022. Columns indicate mean VST expression estimates as implemented in DEseq2 calculated from three individual biological replicates per genotype. Circles indicate expression estimates for individual biological replicates. Asterisks indicate differential gene expression with a statistical significance of  $P_{adj} < 0.01$ . **B-C)** Phenotypes (**B**) and total leaf number (**C**) of Col-0, *tps1-2 GVG::TPS1*, *flc-3*, and *flc-3 tps1-2 GVG::TPS1* double mutant. Flowering time was scored as total leaf number (rosette (grey) and cauline leaves (white)) after bolting. Error bars represent the standard deviation. ANOVA Tukey's multiple comparisons test was applied, and letters represent the statistical differences among genotypes ( $P < 0.001$ ).

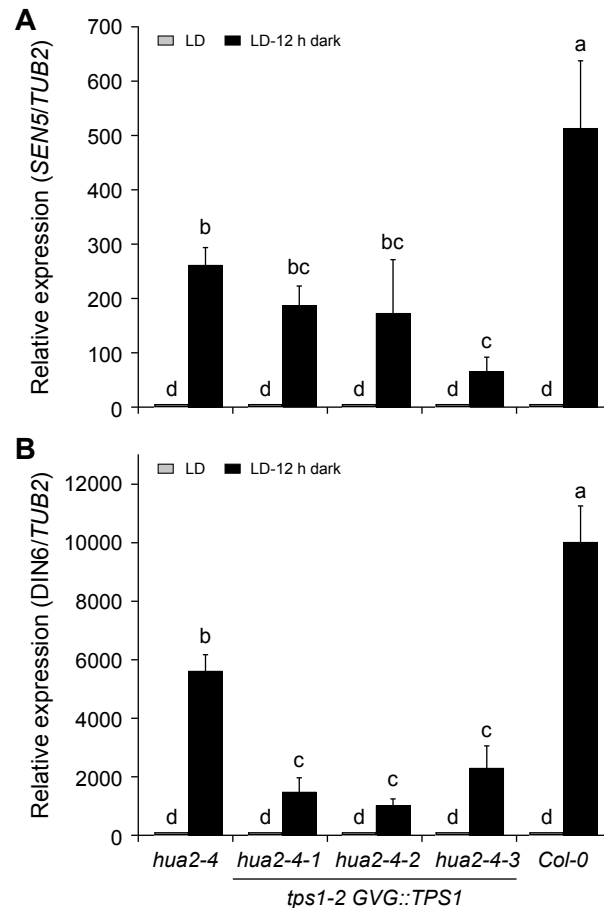

**Figure 6. Expression of SnRK1 target genes *SEN5* and *DIN6* in *hua2-4* and *hua2-4 tps1-2 GVG::TPS1* double mutant.** A-B) Induction of *SEN5* (A) and *DIN6* (B) in response to extended night is attenuated in 14-day-old of *hua2-4* single mutant and three independent lines of the *hua2-4 tps1-2 GVG::TPS1* double mutant. Plants were grown for 14 days in LD (grey) before being exposed to a single extended night (12h additional darkness; black). LD, long days. Error bars represent the standard deviation. ANOVA Tukey's multiple comparisons test was applied, and letters represent the statistical differences among genotypes ( $P < 0.001$ ).

## Parsed Citations

- Abe M, Kobayashi Y, Yamamoto S, Daimon Y, Yamaguchi A, Ikeda Y, Ichinoki H, Notaguchi M, Goto K, Araki T (2005)** FD, a bZIP protein mediating signals from the floral pathway integrator FT at the shoot apex. *Science* 309: 1052-1056  
Google Scholar: [Author Only](#) [Title Only](#) [Author and Title](#)
- Baena-González E, Hanson J (2017)** Shaping plant development through the SnRK1-TOR metabolic regulators. *Curr Opin Plant Biol* 35: 152-157  
Google Scholar: [Author Only](#) [Title Only](#) [Author and Title](#)
- Baena-González E, Lunn JE (2020)** SnRK1 and trehalose 6-phosphate - two ancient pathways converge to regulate plant metabolism and growth. *Curr Opin Plant Biol* 55: 52-59  
Google Scholar: [Author Only](#) [Title Only](#) [Author and Title](#)
- Belda-Palazón B, Costa M, Beeckman T, Rolland F, Baena-González E (2022)** ABA represses TOR and root meristem activity through nuclear exit of the SnRK1 kinase. *Proc Natl Acad Sci USA* 119: 1-3  
Google Scholar: [Author Only](#) [Title Only](#) [Author and Title](#)
- Blázquez MA, Santos E, Flores CL, Martínez-Zapater JM, Salinas J, Gancedo C (1998)** Isolation and molecular characterization of the *Arabidopsis* TPS1 gene, encoding trehalose-6-phosphate synthase. *Plant J* 13: 685-689  
Google Scholar: [Author Only](#) [Title Only](#) [Author and Title](#)
- Blázquez MA, Weigel D (2000)** Integration of floral inductive signals in *Arabidopsis*. *Nature* 404: 889-892  
Google Scholar: [Author Only](#) [Title Only](#) [Author and Title](#)
- Bolger AM, Lohse M, Usadel B (2014)** Trimmomatic: a flexible trimmer for Illumina sequence data. *Bioinformatics* 30: 2114-2120  
Google Scholar: [Author Only](#) [Title Only](#) [Author and Title](#)
- Broucke E, Dang TTV, Li Y, Hulsmans S, Van Leene J, De Jaeger G, Hwang I, Wim VdE, Rolland F (2023)** SnRK1 inhibits anthocyanin biosynthesis through both transcriptional regulation and direct phosphorylation and dissociation of the MYB/bHLH/TTG1 MBW complex. *Plant J* 115: 1193-1213  
Google Scholar: [Author Only](#) [Title Only](#) [Author and Title](#)
- Cabib E, Leloir LF (1958)** THE BIOSYNTHESIS OF TREHALOSE PHOSPHATE. *Journal of Biological Chemistry* 231: 259-275  
Google Scholar: [Author Only](#) [Title Only](#) [Author and Title](#)
- Chary SN, Hicks GR, Choi YG, Carter D, Raikhel NV (2008)** Trehalose-6-phosphate synthase/phosphatase regulates cell shape and plant architecture in *Arabidopsis*. *Plant Physiol* 146: 97-107  
Google Scholar: [Author Only](#) [Title Only](#) [Author and Title](#)
- Chen X, Meyerowitz EM (1999)** HUA1 and HUA2 are two members of the floral homeotic AGAMOUS pathway. *Mol Cell* 3: 349-360  
Google Scholar: [Author Only](#) [Title Only](#) [Author and Title](#)
- Cheng Y, Kato N, Wang W, Li J, Chen X (2003)** Two RNA binding proteins, HEN4 and HUA1, act in the processing of AGAMOUS pre-mRNA in *Arabidopsis thaliana*. *Dev Cell* 4: 53-66  
Google Scholar: [Author Only](#) [Title Only](#) [Author and Title](#)
- Cho LH, Yoon J, An G (2017)** The control of flowering time by environmental factors. *Plant J* 90: 708-719  
Google Scholar: [Author Only](#) [Title Only](#) [Author and Title](#)
- Cingolani P, Platts A, Wang le L, Coon M, Nguyen T, Wang L, Land SJ, Lu X, Ruden DM (2012)** A program for annotating and predicting the effects of single nucleotide polymorphisms, SnpEff: SNPs in the genome of *Drosophila melanogaster* strain w1118; iso-2; iso-3. *Fly (Austin)* 6: 80-92  
Google Scholar: [Author Only](#) [Title Only](#) [Author and Title](#)
- Collani S, Neumann M, Yant L, Schmid M (2019)** FT Modulates Genome-Wide DNA-Binding of the bZIP Transcription Factor FD. *Plant Physiol* 180: 367-380  
Google Scholar: [Author Only](#) [Title Only](#) [Author and Title](#)
- Colombo M, Masiero S, Vanzulli S, Lardelli P, Kater MM, Colombo L (2008)** AGL23, a type I MADS-box gene that controls female gametophyte and embryo development in *Arabidopsis*. *Plant J* 54: 1037-1048  
Google Scholar: [Author Only](#) [Title Only](#) [Author and Title](#)
- Corbesier L, Lejeune P, Bernier G (1998)** The role of carbohydrates in the induction of flowering in *Arabidopsis thaliana*: comparison between the wild type and a starchless mutant. *Planta* 206: 131-137  
Google Scholar: [Author Only](#) [Title Only](#) [Author and Title](#)
- Delatte TL, Sedijani P, Kondou Y, Matsui M, de Jong GJ, Somsen GW, Wiese-Klinkenberg A, Primavesi LF, Paul MJ, Schluepmann H (2011)** Growth arrest by trehalose-6-phosphate: an astonishing case of primary metabolite control over growth by way of the SnRK1 signaling pathway. *Plant Physiol* 157: 160-174



Google Scholar: [Author Only](#) [Title Only](#) [Author and Title](#)

**Delorge I, Figueroa CM, Feil R, Lunn JE, Van Dijk P (2015) Trehalose-6-phosphate synthase 1 is not the only active TPS in *Arabidopsis thaliana*. *Biochem J* 466: 283-290**

Google Scholar: [Author Only](#) [Title Only](#) [Author and Title](#)

**Deng W, Ying H, Helliwell CA, Taylor JM, Peacock WJ, Dennis ES (2011) FLOWERING LOCUS C (FLC) regulates development pathways throughout the life cycle of *Arabidopsis*. *Proc Natl Acad Sci USA* 108: 6680-6685**

Google Scholar: [Author Only](#) [Title Only](#) [Author and Title](#)

**Dietrich K, Weltmeier F, Ehler A, Weiste C, Stahl M, Harter K, Dröge-Laser W (2011) Heterodimers of the *Arabidopsis* transcription factors bZIP1 and bZIP53 reprogram amino acid metabolism during low energy stress. *Plant Cell* 23: 381-395**

Google Scholar: [Author Only](#) [Title Only](#) [Author and Title](#)

**Doyle MR, Bizzell CM, Keller MR, Michaels SD, Song J, Noh YS, Amasino RM (2005) HUA2 is required for the expression of floral repressors in *Arabidopsis thaliana*. *Plant J* 41: 376-385**

Google Scholar: [Author Only](#) [Title Only](#) [Author and Title](#)

**Eastmond PJ, van Dijken AJ, Spielman M, Kerr A, Tissier AF, Dickinson HG, Jones JD, Smekens SC, Graham IA (2002) Trehalose-6-phosphate synthase 1, which catalyses the first step in trehalose synthesis, is essential for *Arabidopsis* embryo maturation. *Plant J* 29: 225-235**

Google Scholar: [Author Only](#) [Title Only](#) [Author and Title](#)

**Figueroa CM, Lunn JE (2016) A Tale of Two Sugars: Trehalose 6-Phosphate and Sucrose. *Plant Physiol* 172: 7-27**

Google Scholar: [Author Only](#) [Title Only](#) [Author and Title](#)

**Gibson SI (2005) Control of plant development and gene expression by sugar signaling. *Curr Opin Plant Biol* 8: 93-102**

Google Scholar: [Author Only](#) [Title Only](#) [Author and Title](#)

**Goddijn OJ, van Dun K (1999) Trehalose metabolism in plants. *Trends Plant Sci* 4: 315-319**

Google Scholar: [Author Only](#) [Title Only](#) [Author and Title](#)

**Ilk N, Ding J, Ihnatowicz A, Koornneef M, Reymond M (2014) Natural variation for anthocyanin accumulation under high-light and low-temperature stress is attributable to the ENHANCER OF AG-4 2 (HUA2) locus in combination with PRODUCTION OF ANTHOCYANIN PIGMENT1 (PAP1) and PAP2. *New Phytol* 206: 422-435**

Google Scholar: [Author Only](#) [Title Only](#) [Author and Title](#)

**Jali SS, Rosloski SM, Janakirama P, Steffen JG, Zhurov V, Berleth T, Clark RM, Grbic V (2014) A plant-specific HUA2-LIKE (HULK) gene family in *Arabidopsis thaliana* is essential for development. *Plant J* 80: 242-254**

Google Scholar: [Author Only](#) [Title Only](#) [Author and Title](#)

**Jung JH, Ju Y, Seo PJ, Lee JH, Park CM (2012) The SOC1-SPL module integrates photoperiod and gibberellic acid signals to control flowering time in *Arabidopsis*. *Plant J* 69: 577-588**

Google Scholar: [Author Only](#) [Title Only](#) [Author and Title](#)

**Kardailsky I, Shukla VK, Ahn JH, Dagenais N, Christensen SK, Nguyen JT, Chory J, Harrison MJ, Weigel D (1999) Activation tagging of the floral inducer FT. *Science* 286: 1962-1965**

Google Scholar: [Author Only](#) [Title Only](#) [Author and Title](#)

**Kim D, Langmead B, Salzberg SL (2015) HISAT: a fast spliced aligner with low memory requirements. *Nat Methods* 12: 357-360**

Google Scholar: [Author Only](#) [Title Only](#) [Author and Title](#)

**Kobayashi Y, Kaya H, Goto K, Iwabuchi M, Araki T (1999) A pair of related genes with antagonistic roles in mediating flowering signals. *Science* 286: 1960-1962**

Google Scholar: [Author Only](#) [Title Only](#) [Author and Title](#)

**Kobayashi Y, Weigel D (2007) Move on up, it's time for change--mobile signals controlling photoperiod-dependent flowering. *Genes Dev* 21: 2371-2384**

Google Scholar: [Author Only](#) [Title Only](#) [Author and Title](#)

**Koo SC, Bracko O, Park MS, Schwab R, Chun HJ, Park KM, Seo JS, Grbic V, Balasubramanian S, Schmid M, Godard F, Yun DJ, Lee SY, Cho MJ, Weigel D, Kim MC (2010) Control of lateral organ development and flowering time by the *Arabidopsis thaliana* MADS-box Gene AGAMOUS-LIKE6. *Plant J* 62: 807-816**

Google Scholar: [Author Only](#) [Title Only](#) [Author and Title](#)

**Lee J, Lee I (2010) Regulation and function of SOC1, a flowering pathway integrator. *J Exp Bot* 61: 2247-2254**

Google Scholar: [Author Only](#) [Title Only](#) [Author and Title](#)

**Lee JH, Ryu HS, Chung KS, Posé D, Kim S, Schmid M, Ahn JH (2013) Regulation of temperature-responsive flowering by MADS-box transcription factor repressors. *Science* 342: 628-632**

Google Scholar: [Author Only](#) [Title Only](#) [Author and Title](#)

Lemus T, Mason GA, Bubb KL, Alexandre CM, Queitsch C, Cuperus JT (2023) AGO1 and HSP90 buffer different genetic variants in *Arabidopsis thaliana*. *Genetics* 223: iyac163

Google Scholar: [Author Only](#) [Title Only](#) [Author and Title](#)

Leyman B, Van Dijck P, Thevelein JM (2001) An unexpected plethora of trehalose biosynthesis genes in *Arabidopsis thaliana*. *Trends Plant Sci* 6: 510-513

Google Scholar: [Author Only](#) [Title Only](#) [Author and Title](#)

Li H, Durbin R (2009) Fast and accurate short read alignment with Burrows-Wheeler transform. *Bioinformatics* 25: 1754-1760

Google Scholar: [Author Only](#) [Title Only](#) [Author and Title](#)

Li Y, Van den Ende W, Rolland F (2014) Sucrose induction of anthocyanin biosynthesis is mediated by DELLA. *Mol Plant* 7: 570-572

Google Scholar: [Author Only](#) [Title Only](#) [Author and Title](#)

Liljegren SJ, Gustafson-Brown C, Pinyopich A, Ditta GS, Yanofsky MF (1999) Interactions among APETALA1, LEAFY, and TERMINAL FLOWER1 specify meristem fate. *Plant Cell* 11: 1007-1018

Google Scholar: [Author Only](#) [Title Only](#) [Author and Title](#)

Love MI, Huber W, Anders S (2014) Moderated estimation of fold change and dispersion for RNA-seq data with DESeq2. *Genome Biology* 15: 1-21

Google Scholar: [Author Only](#) [Title Only](#) [Author and Title](#)

Lunn JE (2007) Gene families and evolution of trehalose metabolism in plants. *Funct Plant Biol* 34: 550-563

Google Scholar: [Author Only](#) [Title Only](#) [Author and Title](#)

Lunn JE, Feil R, Hendriks JH, Gibon Y, Morcuende R, Osuna D, Scheible WR, Carillo P, Hajirezaei MR, Stitt M (2006) Sugar-induced increases in trehalose 6-phosphate are correlated with redox activation of ADPglucose pyrophosphorylase and higher rates of starch synthesis in *Arabidopsis thaliana*. *Biochem J* 397: 139-148

Google Scholar: [Author Only](#) [Title Only](#) [Author and Title](#)

Mair A, Pedrotti L, Wurzinger B, Anrather D, Simeunovic A, Weiste C, Valerio C, Dietrich K, Kirchler T, Naegele T, Vicente Carbajosa J, Hanson J, Baena-Gonzalez E, Chaban C, Weckwerth W, Droege-Laser W, Teige M (2015) SnRK1-triggered switch of bZIP63 dimerization mediates the low-energy response in plants. *Elife* 4: 1-33

Google Scholar: [Author Only](#) [Title Only](#) [Author and Title](#)

Martins MC, Hejazi M, Fettke J, Steup M, Feil R, Krause U, Arrivault S, Vosloh D, Figueroa CM, Ivakov A, Yadav UP, Piques M, Metzner D, Stitt M, Lunn JE (2013) Feedback inhibition of starch degradation in *Arabidopsis* leaves mediated by trehalose 6-phosphate. *Plant Physiol* 163: 1142-1163

Google Scholar: [Author Only](#) [Title Only](#) [Author and Title](#)

Mathieu J, Warthmann N, Kuttner F, Schmid M (2007) Export of FT protein from phloem companion cells is sufficient for floral induction in *Arabidopsis*. *Curr Biol* 17: 1055-1060

Google Scholar: [Author Only](#) [Title Only](#) [Author and Title](#)

Meng LS, Xu MK, Wan W, Yu F, Li C, Wang JY, Wei ZQ, Lv MJ, Cao XY, Li ZY, Jiang JH (2018) Sucrose signaling regulates anthocyanin biosynthesis through a MAPK cascade in *Arabidopsis thaliana*. *Genetics* 210: 607-619

Google Scholar: [Author Only](#) [Title Only](#) [Author and Title](#)

Moon J, Lee H, Kim M, Lee I (2005) Analysis of flowering pathway integrators in *Arabidopsis*. *Plant Cell Physiol* 46: 292-299

Google Scholar: [Author Only](#) [Title Only](#) [Author and Title](#)

Pertea M, Kim D, Pertea GM, Leek JT, Salzberg SL (2016) Transcript-level expression analysis of RNA-seq experiments with HISAT, StringTie and Ballgown. *Nat Protoc* 11: 1650-1667

Google Scholar: [Author Only](#) [Title Only](#) [Author and Title](#)

Portereiko MF, Lloyd A, Steffen JG, Punwani JA, Otsuga D, Drews GN (2006) AGL80 is required for central cell and endosperm development in *Arabidopsis*. *Plant Cell* 18: 1862-1872

Google Scholar: [Author Only](#) [Title Only](#) [Author and Title](#)

Posé D, Verhage L, Ott F, Yant L, Mathieu J, Angenent GC, Immink RG, Schmid M (2013) Temperature-dependent regulation of flowering by antagonistic FLM variants. *Nature* 503: 414-417

Google Scholar: [Author Only](#) [Title Only](#) [Author and Title](#)

Ramon M, De Smet I, Vandesteene L, Naudts M, Leyman B, Van Dijck P, Rolland F, Beeckman T, Thevelein JM (2009) Extensive expression regulation and lack of heterologous enzymatic activity of the Class II trehalose metabolism proteins from *Arabidopsis thaliana*. *Plant Cell Environ* 32: 1015-1032

Google Scholar: [Author Only](#) [Title Only](#) [Author and Title](#)

Romera-Branchat M, Andrés F, Coupland G (2014) Flowering responses to seasonal cues: what's new? *Curr Opin Plant Biol* 21: 120-127

Google Scholar: [Author Only](#) [Title Only](#) [Author and Title](#)

**Singh V, Louis J, Ayre BG, Reese JC, Pegadaraju V, Shah J (2011) TREHALOSE PHOSPHATE SYNTHASE11-dependent trehalose metabolism promotes *Arabidopsis thaliana* defense against the phloem-feeding insect *Myzus persicae*. Plant J 67: 94-104**

Google Scholar: [Author Only](#) [Title Only](#) [Author and Title](#)

**Srikanth A, Schmid M (2011) Regulation of flowering time: all roads lead to Rome. Cell Mol Life Sci 68: 2013-2037**

Google Scholar: [Author Only](#) [Title Only](#) [Author and Title](#)

**Taoka K, Ohki I, Tsuji H, Furuita K, Hayashi K, Yanase T, Yamaguchi M, Nakashima C, Purwestri YA, Tamaki S, Ogaki Y, Shimada C, Nakagawa A, Kojima C, Shimamoto K (2011) 14-3-3 proteins act as intracellular receptors for rice Hd3a florigen. Nature 476: 332-335**

Google Scholar: [Author Only](#) [Title Only](#) [Author and Title](#)

**The 1001 Genomes Consortium (2016) 1,135 genomes reveal the global pattern of polymorphism in *Arabidopsis thaliana*. Cell 166: 481-491.**

Google Scholar: [Author Only](#) [Title Only](#) [Author and Title](#)

**Tian L, Xie Z, Lu C, Hao X, Wu S, Huang Y, Li D, Chen L (2019) The trehalose-6-phosphate synthase TPS5 negatively regulates ABA signaling in *Arabidopsis thaliana*. Plant Cell Rep 38: 869-882**

Google Scholar: [Author Only](#) [Title Only](#) [Author and Title](#)

**Turck F, Fornara F, Coupland G (2008) Regulation and identity of florigen: FLOWERING LOCUS T moves center stage. Annu Rev Plant Biol 59: 573-594**

Google Scholar: [Author Only](#) [Title Only](#) [Author and Title](#)

**Van Dijck P, Mascorro-Gallardo JO, De Bus M, Royackers K, Iturriaga G, Thevelein JM (2002) Truncation of *Arabidopsis thaliana* and *Selaginella lepidophylla* trehalose-6-phosphate synthase unlocks high catalytic activity and supports high trehalose levels on expression in yeast. Biochem J 366: 63-71**

Google Scholar: [Author Only](#) [Title Only](#) [Author and Title](#)

**van Dijken AJ, Schluepmann H, Smeekens SC (2004) *Arabidopsis thaliana* trehalose-6-phosphate synthase 1 is essential for normal vegetative growth and transition to flowering. Plant Physiol 135: 969-977**

Google Scholar: [Author Only](#) [Title Only](#) [Author and Title](#)

**Van Leene J, Eeckhout D, Gadeyne A, Matthijs C, Han C, De Winne N, Persiau G, Van De Slijke E, Persyn F, Mertens T, Smagghe W, Crepin N, Broucke E, Van Damme D, Pleskot R, Rolland F, De Jaeger G (2022) Mapping of the plant SnRK1 kinase signalling network reveals a key regulatory role for the class II T6P synthase-like proteins. Nat Plants 8: 1245-1261**

Google Scholar: [Author Only](#) [Title Only](#) [Author and Title](#)

**Vandesteene L, López-Galvis L, Vanneste K, Feil R, Maere S, Lammens W, Rolland F, Lunn JE, Avonce N, Beeckman T, Van Dijck P (2012) Expansive evolution of the trehalose-6-phosphate phosphatase gene family in *Arabidopsis*. Plant Physiol 160: 884-896**

Google Scholar: [Author Only](#) [Title Only](#) [Author and Title](#)

**Wahl V, Ponnu J, Schlereth A, Arrivault S, Langenecker T, Franke A, Feil R, Lunn JE, Stitt M, Schmid M (2013) Regulation of flowering by trehalose-6-phosphate signaling in *Arabidopsis thaliana*. Science 339: 704-707**

Google Scholar: [Author Only](#) [Title Only](#) [Author and Title](#)

**Wang M, Zang L, Jiao F, Perez-Garcia M-D, Ogé L, Hamama L, Le Gourrierec J, Sakr S, Chen J (2020) Sugar Signaling and Post-transcriptional Regulation in Plants: An Overlooked or an Emerging Topic? Front Plant Sci 11: 578096**

**Wang Q, Sajja U, Rosloski S, Humphrey T, Kim MC, Bomblies K, Weigel D, Grbic V (2007) HUA2 caused natural variation in shoot morphology of *A. thaliana*. Curr Biol 17: 1513-1519**

Google Scholar: [Author Only](#) [Title Only](#) [Author and Title](#)

**Weigel D, Nilsson O (1995) A developmental switch sufficient for flower initiation in diverse plants. Nature 377: 495-500**

Google Scholar: [Author Only](#) [Title Only](#) [Author and Title](#)

**Wigge PA, Kim MC, Jaeger KE, Busch W, Schmid M, Lohmann JU, Weigel D (2005) Integration of spatial and temporal information during floral induction in *Arabidopsis*. Science 309: 1056-1059**

Google Scholar: [Author Only](#) [Title Only](#) [Author and Title](#)

**Xing LB, Zhang D, Li YM, Shen YW, Zhao CP, Ma JJ, An N, Han MY (2015) Transcription Profiles Reveal Sugar and Hormone Signaling Pathways Mediating Flower Induction in Apple (*Malus domestica* Borkh.). Plant Cell Physiol 56: 2052-2068**

Google Scholar: [Author Only](#) [Title Only](#) [Author and Title](#)

**Yadav UP, Ivakov A, Feil R, Duan GY, Walther D, Giavalisco P, Piques M, Carillo P, Hubberten HM, Stitt M, Lunn JE (2014) The sucrose-trehalose 6-phosphate (Tre6P) nexus: specificity and mechanisms of sucrose signalling by Tre6P. J Exp Bot 65: 1051-1068**

Google Scholar: [Author Only](#) [Title Only](#) [Author and Title](#)

**Yan W, Chen D, Kaufmann K (2016) Molecular mechanisms of floral organ specification by MADS domain proteins. Curr Opin Plant Biol 29: 154-162**

Google Scholar: [Author Only](#) [Title Only](#) [Author and Title](#)

**Yoo SK, Chung KS, Kim J, Lee JH, Hong SM, Yoo SJ, Yoo SY, Lee JS, Ahn JH (2005) CONSTANS activates SUPPRESSOR OF OVEREXPRESSION OF CONSTANS 1 through FLOWERING LOCUS T to promote flowering in Arabidopsis. Plant Physiol 139: 770-778**

Google Scholar: [Author Only](#) [Title Only](#) [Author and Title](#)

**Zacharaki V, Ponnu J, Crepin N, Langenecker T, Hagmann J, Skorzinski N, Musialak-Lange M, Wahl V, Rolland F, Schmid M (2022) Impaired KIN10 function restores developmental defects in the Arabidopsis trehalose 6-phosphate synthase1 (tps1) mutant. New Phytol 235: 220-233**

Google Scholar: [Author Only](#) [Title Only](#) [Author and Title](#)
